# Supplementary material for: Economic Considerations for Advancement Through the Progressive Control Pathway: Cost–Benefit Analysis of an FMD Disease-Free Zone in Punjab Province, Pakistan
Source: Front Vet Sci. 2021 Aug 18;8:703473. doi: 10.3389/fvets.2021.703473 (PMC8416473; doi:10.3389/fvets.2021.703473)
Supplement: Supplementary Material A — Production system data. [file Data_Sheet_1.zip]

Archive with 16 entries (16 files):
- Supplementary material A - Production system data_updated.pdf
- __MACOSX/._Supplementary material A - Production system data_updated.pdf
- Supplementary material B - Number of Outbreaks_updated.pdf
- __MACOSX/._Supplementary material B - Number of Outbreaks_updated.pdf
- Supplementary material C - Programme cost data_updated.pdf
- __MACOSX/._Supplementary material C - Programme cost data_updated.pdf
- Supplementary material D - Expert opinion exercise for workshop_updated.pdf
- __MACOSX/._Supplementary material D - Expert opinion exercise for workshop_updated.pdf
- Supplementary material E - Data request for beef feedlots - updated.pdf
- __MACOSX/._Supplementary material E - Data request for beef feedlots - updated.pdf
- Supplementary material F - Expert opinion exercise for desert livestock systems.pdf
- __MACOSX/._Supplementary material F - Expert opinion exercise for desert livestock systems.pdf
- Supplementary material G - Breakdown of costs by production system.jpg
- __MACOSX/._Supplementary material G - Breakdown of costs by production system.jpg
- Supplementary material H - Results - costs and benefits by year.pdf
- __MACOSX/._Supplementary material H - Results - costs and benefits by year.pdf
