# Supplementary material for: Economic Considerations for Advancement Through the Progressive Control Pathway: Cost–Benefit Analysis of an FMD Disease-Free Zone in Punjab Province, Pakistan
Source: Front Vet Sci. 2021 Aug 18;8:703473. doi: 10.3389/fvets.2021.703473 (PMC8416473; doi:10.3389/fvets.2021.703473)
Supplement: Supplementary Material A — Production system data. [file Data_Sheet_1.zip › Supplementary material A - Production system data_updated.pdf]

Supplementary material A – Data used for production system models  
Mixed-dairy production systems.

**Table A1. Dairy farming systems considered in the farm model including the starting model parameters. y=year. B = buffalo. C = cattle. The herd sizes were based on estimates provided in (de Jong, 2013; Farooq et al., 2007; Hagmann, 2011; Younas, 2013).**

| Parameter          | Category     | Farming system            |      |                               |      |                  |      |            |      |           |        |       |
|--------------------|--------------|---------------------------|------|-------------------------------|------|------------------|------|------------|------|-----------|--------|-------|
|                    |              | Smallholder – subsistence |      | Smallholder market - oriented |      | Rural Commercial |      | Peri-urban |      | Corporate | Desert |       |
|                    |              | B                         | C    | B                             | C    | B                | C    | B          | C    | C         | B      | C     |
| Herd size          | Min          | 0.5                       | 0.5  | 1.2                           | 1.8  | 5                | 0    | 9          | 1    | 200       | 0      | 10    |
|                    | Mode         | 1.5                       | 1.5  | 2                             | 3    | 27               | 3    | 45         | 5    | 1500      | 1.1    | 51    |
|                    | Max          | 2.5                       | 2.5  | 2.8                           | 4.2  | 45               | 5    | 180        | 20   | 5000      | 5      | 200   |
| Age-sex proportion | Bulls <1year | 0.06                      | 0.1  | 0.06                          | 0.1  | 0.06             | 0.06 | 0.025      | 0.05 | 0.12      | 0.078  | 0.1   |
|                    | Bulls >1y    | 0.02                      | 0    | 0.02                          | 0    | 0                | 0    | 0          | 0    | 0         | 0.017  | 0.002 |
|                    | Heifers <1y  | 0.1                       | 0.1  | 0.1                           | 0.1  | 0.12             | 0.14 | 0.025      | 0.05 | 0.12      | 0.078  | 0.1   |
|                    | Heifers 1-2y | 0.09                      | 0.1  | 0.09                          | 0.1  | 0.09             | 0.1  | 0          | 0    | 0.1       | 0.042  | 0.022 |
|                    | Heifers 2-3y | 0.07                      | 0.05 | 0.07                          | 0.05 | 0.07             | 0.08 | 0.025      | 0.09 | 0.1       | 0.042  | 0.022 |
|                    | Heifers 3-4y | 0.05                      | 0.05 | 0.05                          | 0.05 | 0.05             | 0.05 | 0.025      | 0.09 | 0.06      | 0.042  | 0.022 |
|                    | Heifers 4-5y | 0.02                      | 0    | 0.02                          | 0    | 0.02             | 0.02 | 0.025      | 0.09 | 0         | 0.042  | 0.022 |
|                    | Cows         | 0.59                      | 0.6  | 0.59                          | 0.6  | 0.59             | 0.55 | 0.875      | 0.63 | 0.5       | 0.66   | 0.71  |

**Table A2. Estimates of FMD morbidity on affected farms used in the production loss model based on that reported by Ferrari et al., 2013. n = total number of animals. Due to the absence of age-incidence data at the production system level, the same incidence data were used for each. B = buffalo. C = cattle.**

| Age category          | Category  | Farming system          |     |                             |     |                  |      |            |      |           |        |      |
|-----------------------|-----------|-------------------------|-----|-----------------------------|-----|------------------|------|------------|------|-----------|--------|------|
|                       |           | Smallholder subsistence |     | Smallholder market-oriented |     | Rural Commercial |      | Peri-urban |      | Corporate | Desert |      |
|                       |           | B                       | C   | B                           | C   | B                | C    | B          | C    | C         | B      | C    |
| <1 year               | Incidence | 0.56                    | 0.7 | 0.56                        | 0.7 | 0.56             | 0.74 | 0.56       | 0.74 | 0.74      | 0.56   | 0.74 |
|                       | n         | 129                     | 110 | 129                         | 110 | 129              | 110  | 129        | 110  | 110       | 129    | 110  |
| Heifers and males >1y | Incidence | 0.5                     | 0.7 | 0.5                         | 0.7 | 0.5              | 0.7  | 0.5        | 0.7  | 0.7       | 0.5    | 0.7  |
|                       | n         | 102                     | 110 | 102                         | 110 | 102              | 110  | 102        | 110  | 110       | 102    | 110  |
| Cows                  | Incidence | 0.43                    | 0.6 | 0.43                        | 0.6 | 0.43             | 0.56 | 0.43       | 0.56 | 0.56      | 0.43   | 0.56 |
|                       | n         | 304                     | 302 | 304                         | 302 | 304              | 302  | 304        | 302  | 302       | 304    | 302  |

Table A3. **Mortality, offtake rates in FMD cases and non-cases, and distress sale rates in FMD cases by age-sex category for different dairy production systems. All figures are proportions. Distress sales reflect animals sold at a lower price so that a rapid sale can be made. B = buffalo. C = cattle.**

| Parameter                  | Category | Farming system          |     |                             |     |                  |      |            |      |           |        |      | Data source    |
|----------------------------|----------|-------------------------|-----|-----------------------------|-----|------------------|------|------------|------|-----------|--------|------|----------------|
|                            |          | Smallholder subsistence |     | Smallholder market-oriented |     | Rural Commercial |      | Peri-urban |      | Corporate | Desert |      |                |
|                            |          |                         |     |                             |     |                  |      |            |      |           |        |      |                |
| B                          | C        | B                       | C   | B                           | C   | B                | C    | C          | B    | C         |        |      |                |
| Male calves <1y            |          |                         |     |                             |     |                  |      |            |      |           |        |      |                |
| Mortality rate (FMD cases) | Min      | 0.18                    | 0.2 | 0.18                        | 0.2 | 0.2              | 0.2  | 0.2        | 0.2  | 0.09      | 0.18   | 0.2  | Expert opinion |
|                            | Mode     | 0.23                    | 0.2 | 0.23                        | 0.2 | 0.28             | 0.28 | 0.28       | 0.28 | 0.14      | 0.23   | 0.2  |                |
|                            | Max      | 0.4                     | 0.4 | 0.4                         | 0.4 | 0.45             | 0.45 | 0.45       | 0.45 | 0.23      | 0.4    | 0.4  |                |
| Mortality rate (non-cases) | Min      | 0.2                     | 0.1 | 0.2                         | 0.1 | 0.24             | 0.1  | 0.24       | 0.1  | 0.08      | 0.2    | 0.1  | Expert opinion |
|                            | Mode     | 0.28                    | 0.2 | 0.28                        | 0.2 | 0.31             | 0.21 | 0.31       | 0.21 | 0.11      | 0.28   | 0.2  |                |
|                            | Max      | 0.4                     | 0.3 | 0.4                         | 0.3 | 0.39             | 0.31 | 0.39       | 0.31 | 0.16      | 0.4    | 0.3  |                |
| Offtake rates (FMD cases)  | Min      | 0                       | 0   | 0.05                        | 0.1 | 0                | 0.05 | 0.05       | 0.05 | 0.4       | 0      | 0    | Expert opinion |
|                            | Max      | 0.1                     | 0.1 | 0.2                         | 0.2 | 0.1              | 0.3  | 0.35       | 0.35 | 0.5       | 0.05   | 0.1  |                |
| Offtake rates (non-cases)  | Min      | 0.3                     | 0.3 | 0.3                         | 0.3 | 0.5              | 0.5  | 0.5        | 0.5  | 0.75      | 0.3    | 0.9  | Expert opinion |
|                            | Max      | 0.6                     | 0.6 | 0.6                         | 0.6 | 0.75             | 0.75 | 0.75       | 0.75 | 0.95      | 0.6    | 0.9  |                |
| Distress sales             | Min      | 0                       | 0   | 0.05                        | 0.1 | 0.07             | 0.06 | 0.09       | 0.15 | 0.09      | 0      | 0    | Expert opinion |
|                            | Max      | 0.08                    | 0.1 | 0.23                        | 0.2 | 0.28             | 0.34 | 0.47       | 0.55 | 0.36      | 0.08   | 0.1  |                |
| Female calves <1y          |          |                         |     |                             |     |                  |      |            |      |           |        |      |                |
| Mortality rate (FMD cases) | Min      | 0.18                    | 0.2 | 0.18                        | 0.2 | 0.2              | 0.2  | 0.2        | 0.2  | 0.08      | 0.18   | 0.2  | Expert opinion |
|                            | Mode     | 0.23                    | 0.3 | 0.23                        | 0.3 | 0.25             | 0.25 | 0.25       | 0.25 | 0.11      | 0.23   | 0.3  |                |
|                            | Max      | 0.4                     | 0.4 | 0.4                         | 0.4 | 0.4              | 0.4  | 0.4        | 0.4  | 0.2       | 0.4    | 0.4  |                |
| Mortality rate (non-cases) | Min      | 0.2                     | 0.1 | 0.2                         | 0.1 | 0.24             | 0.1  | 0.24       | 0.1  | 0.08      | 0.2    | 0.1  | Expert opinion |
|                            | Mode     | 0.28                    | 0.2 | 0.28                        | 0.2 | 0.31             | 0.21 | 0.31       | 0.21 | 0.11      | 0.28   | 0.2  |                |
|                            | Max      | 0.4                     | 0.3 | 0.4                         | 0.3 | 0.39             | 0.31 | 0.39       | 0.31 | 0.16      | 0.4    | 0.3  |                |
| Offtake rates (FMD cases)  | Min      | 0                       | 0   | 0.05                        | 0.1 | 0                | 0.05 | 0.05       | 0.05 | 0.4       | 0      | 0    | Expert opinion |
|                            | Max      | 0.1                     | 0.1 | 0.2                         | 0.2 | 0.1              | 0.3  | 0.35       | 0.35 | 0.5       | 0.05   | 0.1  |                |
| Offtake rates (non-cases)  | Min      | 0.05                    | 0.1 | 0.05                        | 0.1 | 0.08             | 0.08 | 0.08       | 0.08 | 0.28      | 0.05   | 0.15 | Expert opinion |
|                            | Max      | 0.09                    | 0.1 | 0.09                        | 0.1 | 0.23             | 0.23 | 0.23       | 0.23 | 0.43      | 0.09   | 0.15 |                |
| Distress sales             | Min      | 0                       | 0   | 0                           | 0   | 0                | 0.05 | 0.13       | 0.04 | 0.05      | 0      | 0    | Expert opinion |
|                            | Max      | 0                       | 0   | 0.04                        | 0   | 0.04             | 0.15 | 0.47       | 0.22 | 0.52      | 0      | 0    |                |
| Bulls >1y                  |          |                         |     |                             |     |                  |      |            |      |           |        |      |                |
| Mortality rate (FMD cases) | Min      | 0                       | 0   | 0                           | 0   | 0.01             | 0.01 | 0.01       | 0.01 | 0.01      | 0      | 0    | Expert opinion |
|                            | Mode     | 0.02                    | 0   | 0.02                        | 0   | 0.02             | 0.02 | 0.02       | 0.02 | 0.05      | 0.02   | 0    |                |
|                            | Max      | 0.04                    | 0   | 0.04                        | 0   | 0.04             | 0.04 | 0.04       | 0.04 | 0.09      | 0.04   | 0    |                |
| Mortality rate (non-cases) | Min      | 0.05                    | 0.1 | 0.05                        | 0.1 | 0.05             | 0.05 | 0.05       | 0.05 | 0.01      | 0.05   | 0.1  | Expert opinion |
|                            | Mode     | 0.1                     | 0.1 | 0.1                         | 0.1 | 0.09             | 0.09 | 0.09       | 0.09 | 0.04      | 0.1    | 0.1  |                |
|                            | Max      | 0.15                    | 0.1 | 0.15                        | 0.1 | 0.13             | 0.13 | 0.13       | 0.13 | 0.07      | 0.15   | 0.1  |                |
| Offtake rates (FMD cases)  | Min      | 0                       | 0   | 0.02                        | 0   | 0                | 0    | 0.05       | 0.03 | 0.4       | 0      | 0    | Expert opinion |
|                            | Max      | 0.03                    | 0   | 0.04                        | 0   | 0.03             | 0.05 | 0.2        | 0.1  | 0.5       | 0.03   | 0    |                |
| Offtake rates (non-cases)  | Min      | 0.65                    | 0.7 | 0.65                        | 0.7 | 0.75             | 0.75 | 0.75       | 0.75 | 0.45      | 0.65   | 0.9  | Expert opinion |
|                            | Max      | 0.9                     | 0.9 | 0.9                         | 0.9 | 0.9              | 0.9  | 0.9        | 0.9  | 0.6       | 0.9    | 0.9  |                |
| Distress sales             | Min      | 0.03                    | 0   | 0.01                        | 0   | 0.03             | 0.07 | 0.04       | 0.05 | 0.05      | 0.03   | 0    | Expert opinion |
|                            | Max      | 0.29                    | 0.3 | 0.12                        | 0.1 | 0.14             | 0.19 | 0.31       | 0.25 | 0.5       | 0.29   | 0.3  |                |
| Heifers >1y                |          |                         |     |                             |     |                  |      |            |      |           |        |      |                |
| Mortality rate (FMD cases) | Min      | 0                       | 0   | 0                           | 0   | 0.01             | 0.01 | 0.01       | 0.01 | 0         | 0      | 0    | Expert opinion |
|                            | Mode     | 0.02                    | 0   | 0.02                        | 0   | 0.02             | 0.02 | 0.02       | 0.02 | 0.01      | 0.02   | 0    |                |
|                            | Max      | 0.04                    | 0   | 0.04                        | 0   | 0.04             | 0.04 | 0.04       | 0.04 | 0.03      | 0.04   | 0    |                |
| Mortality rate (non-cases) | Min      | 0.08                    | 0.1 | 0.08                        | 0.1 | 0.07             | 0.05 | 0.07       | 0.05 | 0.02      | 0.08   | 0.1  | Expert opinion |
|                            | Mode     | 0.13                    | 0.1 | 0.13                        | 0.1 | 0.11             | 0.07 | 0.11       | 0.07 | 0.05      | 0.13   | 0.1  |                |

| Parameter                  | Category | Farming system          |     |                             |     |                  |      |            |      |           |        |      | Data source    |
|----------------------------|----------|-------------------------|-----|-----------------------------|-----|------------------|------|------------|------|-----------|--------|------|----------------|
|                            |          | Smallholder subsistence |     | Smallholder market-oriented |     | Rural Commercial |      | Peri-urban |      | Corporate | Desert |      |                |
|                            |          |                         |     |                             |     |                  |      |            |      |           |        |      |                |
|                            | B        | C                       | B   | C                           | B   | C                | B    | C          | C    | B         | C      |      |                |
|                            | Max      | 0.18                    | 0.1 | 0.18                        | 0.1 | 0.15             | 0.1  | 0.15       | 0.1  | 0.07      | 0.18   | 0.1  |                |
| Offtake rates (FMD cases)  | Min      | 0                       | 0   | 0.03                        | 0   | 0                | 0    | 0.05       | 0.05 | 0.4       | 0      | 0    | Expert opinion |
|                            | Max      | 0.03                    | 0   | 0.05                        | 0.1 | 0.03             | 0.05 | 0.2        | 0.15 | 0.5       | 0.03   | 0    |                |
| Offtake rates (non-cases)  | Min      | 0.08                    | 0.1 | 0.08                        | 0.1 | 0.08             | 0.08 | 0.08       | 0.08 | 0.08      | 0.08   | 0.1  | Expert opinion |
|                            | Max      | 0.18                    | 0.2 | 0.18                        | 0.2 | 0.19             | 0.19 | 0.19       | 0.19 | 0.15      | 0.18   | 0.1  |                |
| Distress sales             | Min      | 0                       | 0   | 0                           | 0   | 0                | 0.05 | 0.04       | 0.05 | 0.04      | 0      | 0    | Expert opinion |
|                            | Max      | 0.07                    | 0.1 | 0.04                        | 0   | 0.04             | 0.15 | 0.24       | 0.2  | 0.47      | 0.07   | 0.1  |                |
| Cows                       |          |                         |     |                             |     |                  |      |            |      |           |        |      |                |
| Mortality rate (FMD cases) | Min      | 0                       | 0   | 0                           | 0   | 0                | 0    | 0          | 0    | 0         | 0      | 0    | Expert opinion |
|                            | Mode     | 0                       | 0   | 0                           | 0   | 0.01             | 0.01 | 0.01       | 0.01 | 0         | 0      | 0    |                |
|                            | Max      | 0.01                    | 0   | 0.01                        | 0   | 0.03             | 0.03 | 0.03       | 0.03 | 0.01      | 0.01   | 0    |                |
| Mortality rate (non-cases) | Min      | 0.02                    | 0   | 0.02                        | 0   | 0.02             | 0.03 | 0.02       | 0.03 | 0.02      | 0.02   | 0    | Expert opinion |
|                            | Mode     | 0.05                    | 0.1 | 0.05                        | 0.1 | 0.06             | 0.05 | 0.06       | 0.05 | 0.03      | 0.05   | 0.1  |                |
|                            | Max      | 0.09                    | 0.1 | 0.09                        | 0.1 | 0.09             | 0.08 | 0.09       | 0.08 | 0.04      | 0.09   | 0.1  |                |
| Offtake rates (FMD cases)  | Min      | 0.04                    | 0   | 0.05                        | 0.1 | 0.07             | 0.1  | 0.18       | 0.18 | 0.45      | 0.04   | 0    | Expert opinion |
|                            | Max      | 0.09                    | 0.1 | 0.22                        | 0.2 | 0.14             | 0.23 | 0.43       | 0.33 | 0.55      | 0.09   | 0.1  |                |
| Offtake rates (non-cases)  | Min      | 0.03                    | 0   | 0.03                        | 0   | 0.04             | 0.04 | 0.04       | 0.04 | 0.03      | 0.03   | 0.05 | Expert opinion |
|                            | Max      | 0.07                    | 0.1 | 0.07                        | 0.1 | 0.13             | 0.13 | 0.13       | 0.13 | 0.13      | 0.07   | 0.05 |                |
| Distress sales             | Min      | 0.04                    | 0   | 0.01                        | 0   | 0.01             | 0.07 | 0.1        | 0.1  | 0.05      | 0.04   | 0    | Expert opinion |
|                            | Max      | 0.09                    | 0.1 | 0.12                        | 0.1 | 0.08             | 0.19 | 0.29       | 0.22 | 0.53      | 0.09   | 0.1  |                |

Table A4. Fertility parameters used in model. B = buffalo. C = cattle.

| Parameter                       | Category | Farming system          |      |                             |      |                  |      |            |      |           |        |      | Data source    |
|---------------------------------|----------|-------------------------|------|-----------------------------|------|------------------|------|------------|------|-----------|--------|------|----------------|
|                                 |          | Smallholder subsistence |      | Smallholder market-oriented |      | Rural Commercial |      | Peri-urban |      | Corporate | Desert |      |                |
|                                 |          |                         |      |                             |      |                  |      |            |      |           |        |      |                |
|                                 |          | B                       | C    | B                           | C    | B                | C    | B          | C    | C         | B      | C    |                |
| Pregnancy rate (cows)           | Min      | 0.35                    | 0.4  | 0.35                        | 0.4  | 0.31             | 0.4  | 0.31       | 0.4  | 0.54      | 0.35   | 0.4  | Expert opinion |
|                                 | Max      | 0.65                    | 0.6  | 0.65                        | 0.6  | 0.56             | 0.6  | 0.56       | 0.6  | 0.78      | 0.65   | 0.6  |                |
| Heat detection rate (cows)      | Min      | 0.4                     | 0.3  | 0.4                         | 0.3  | 0.48             | 0.34 | 0.48       | 0.34 | 0.5       | 0.4    | 0.3  | Expert opinion |
|                                 | Max      | 0.58                    | 0.7  | 0.58                        | 0.7  | 0.65             | 0.66 | 0.65       | 0.66 | 0.8       | 0.58   | 0.7  |                |
| Voluntary waiting period (days) | Min      | 90                      | 60   | 90                          | 60   | 95               | 60   | 95         | 60   | 55        | 90     | 60   | Expert opinion |
|                                 | Max      | 147                     | 110  | 147                         | 110  | 145              | 110  | 145        | 110  | 85        | 147    | 110  |                |
| Pregnancy rate (heifers)        | Min      | 0.3                     | 0.1  | 0.3                         | 0.1  | 0.3              | 0.36 | 0.3        | 0.36 | 0.5       | 0.3    | 0.1  | Expert opinion |
|                                 | Max      | 0.6                     | 0.7  | 0.6                         | 0.7  | 0.6              | 0.71 | 0.6        | 0.71 | 0.74      | 0.6    | 0.7  |                |
| Heat detection rate (heifers)   | Min      | 0.46                    | 0.4  | 0.46                        | 0.4  | 0.46             | 0.36 | 0.46       | 0.36 | 0.45      | 0.46   | 0.4  | Expert opinion |
|                                 | Max      | 0.66                    | 0.7  | 0.66                        | 0.7  | 0.66             | 0.7  | 0.66       | 0.7  | 0.8       | 0.66   | 0.7  |                |
| Missed cycles in FMD cases      | Min      | 5                       | 7.5  | 5                           | 7.5  | 5                | 7.5  | 5          | 7.5  | 7.5       | 5      | 7.5  | Expert opinion |
|                                 | Mode     | 6.5                     | 10.5 | 6.5                         | 10.5 | 6.5              | 10.5 | 6.5        | 10.5 | 10.5      | 6.5    | 10.5 |                |
|                                 | Max      | 11                      | 16   | 11                          | 16   | 11               | 16   | 11         | 16   | 16        | 11     | 16   |                |

| Parameter                              | Category      | Farming system          |      |                             |      |                  |      |            |      |           |        |      | Data source                           |
|----------------------------------------|---------------|-------------------------|------|-----------------------------|------|------------------|------|------------|------|-----------|--------|------|---------------------------------------|
|                                        |               | Smallholder subsistence |      | Smallholder market-oriented |      | Rural Commercial |      | Peri-urban |      | Corporate | Desert |      |                                       |
|                                        |               |                         |      |                             |      |                  |      |            |      |           |        |      |                                       |
| Abortion rate (cows)                   | Min           | 0.01                    | 0.2  | 0.01                        | 0.2  | 0.01             | 0.05 | 0.01       | 0.05 | 0.05      | 0.01   | 0.2  | Export opinion                        |
|                                        | Mode          | 0.03                    | 0.1  | 0.03                        | 0.1  | 0.03             | 0.08 | 0.03       | 0.08 | 0.08      | 0.03   | 0.1  |                                       |
|                                        | Max           | 0.05                    | 0.1  | 0.05                        | 0.1  | 0.05             | 0.13 | 0.05       | 0.13 | 0.13      | 0.05   | 0.1  |                                       |
| Abortion rate (heifers)                | Min           | 0.02                    | 0.1  | 0.02                        | 0.1  | 0.02             | 0.05 | 0.02       | 0.05 | 0.05      | 0.02   | 0.1  | Expert opinion                        |
|                                        | Mode          | 0.03                    | 0.1  | 0.03                        | 0.1  | 0.03             | 0.09 | 0.03       | 0.09 | 0.09      | 0.03   | 0.1  |                                       |
|                                        | Max           | 0.08                    | 0.1  | 0.08                        | 0.1  | 0.08             | 0.15 | 0.08       | 0.15 | 0.15      | 0.08   | 0.1  |                                       |
| Cost of abortion (PKR)                 | Fixed         | 1500                    | 1500 | 1500                        | 1500 | 1500             | 1500 | 1500       | 1500 | 1500      | 1500   | 1500 | (Fareed et al., 2017)                 |
| Age at first calving                   | 2-3 years old | 0.08                    | 0.1  | 0.08                        | 0.1  | 0.08             | 0.08 | 0.08       | 0.08 | 0.08      | 0.08   | 0.1  | (Pakistan Bureau of Statistics, 2006) |
|                                        | 3-4 years old | 0.78                    | 0.8  | 0.78                        | 0.8  | 0.78             | 0.78 | 0.78       | 0.78 | 0.78      | 0.78   | 0.8  |                                       |
|                                        | 4-5 years old | 0.14                    | 0.1  | 0.14                        | 0.1  | 0.14             | 0.14 | 0.14       | 0.14 | 0.14      | 0.14   | 0.1  |                                       |
| Extended age of first calving (months) | Min           | 7                       | 7.5  | 7                           | 7.5  | 7                | 7.5  | 7          | 7.5  | 7.5       | 7      | 7.5  | Expert opinion                        |
|                                        | Mode          | 9                       | 9    | 9                           | 9    | 9                | 9    | 9          | 9    | 9         | 9      | 9    |                                       |
|                                        | Max           | 12                      | 12.5 | 12                          | 12.5 | 12               | 12.5 | 12         | 12.5 | 12.5      | 12     | 12.5 |                                       |

**Table A5. Estimated value (thousand PKR per head) of cattle and buffalo in different production systems by age-sex categories. All values are based on expert opinion. B = buffalo. C = cattle.**

| Parameter         | Category | Farming system          |       |                             |       |                  |       |            |       |           |        |       |
|-------------------|----------|-------------------------|-------|-----------------------------|-------|------------------|-------|------------|-------|-----------|--------|-------|
|                   |          | Smallholder subsistence |       | Smallholder market-oriented |       | Rural Commercial |       | Peri-urban |       | Corporate | Desert |       |
|                   |          | B                       | C     | B                           | C     | B                | C     | B          | C     | C         | B      | C     |
| Female calves <1y | min      | 10.5                    | 9.0   | 10.5                        | 9.0   | 17.5             | 12.2  | 17.5       | 16.5  | 22.5      | 10.5   | 9.0   |
|                   | max      | 17.5                    | 10.0  | 17.5                        | 10.0  | 30.0             | 19.4  | 30.0       | 23.5  | 33.0      | 17.5   | 10.0  |
| Male calves <1y   | min      | 12.5                    | 8.0   | 12.5                        | 8.0   | 15.5             | 9.8   | 12.5       | 10.0  | 13.5      | 12.5   | 8.0   |
|                   | max      | 22.5                    | 9.0   | 22.5                        | 9.0   | 260.0            | 15.6  | 20.0       | 17.5  | 22.5      | 22.5   | 9.0   |
| Males >1y         | min      | 40.0                    | 90.0  | 40.0                        | 90.0  | 47.5             | 50.0  | 35.0       | 50.0  | 57.8      | 40.0   | 90.0  |
|                   | max      | 100.0                   | 180.0 | 100.0                       | 180.0 | 110.0            | 95.0  | 82.5       | 100.0 | 110.0     | 100.0  | 180.0 |
| Heifer 1-2y       | min      | 65.0                    | 95.0  | 65.0                        | 95.0  | 70.0             | 95.0  | 60.0       | 110.0 | 115.0     | 65.0   | 95.0  |
|                   | max      | 85.0                    | 160.0 | 85.0                        | 160.0 | 90.0             | 160.0 | 90.0       | 175.0 | 182.5     | 85.0   | 160.0 |
| Heifer 2-5y       | min      | 85.0                    | 70.0  | 85.0                        | 70.0  | 100.0            | 117.5 | 90.0       | 125.0 | 130.0     | 85.0   | 70.0  |
|                   | max      | 170.0                   | 90.0  | 170.0                       | 90.0  | 195.0            | 165.0 | 180.0      | 185.0 | 200.0     | 170.0  | 90.0  |
| Cows              | min      | 110.0                   | 130.0 | 110.0                       | 130.0 | 115.0            | 160.0 | 170.0      | 175.0 | 180.0     | 110.0  | 130.0 |
|                   | max      | 225.0                   | 230.0 | 225.0                       | 230.0 | 205.0            | 275.0 | 292.5      | 292.5 | 325.0     | 225.0  | 230.0 |

Table A6. Proportion of value for distress sales based on that reported by (FAO, 2016). The same values were used for males and females for each production system

| Age category | Category | Buffalo | Cattle |
|--------------|----------|---------|--------|
| Youngstock   | Min      | 0.39    | 0.39   |
|              | Max      | 0.47    | 0.47   |
| Adults       | Min      | 0.5     | 0.5    |
|              | Max      | 0.6     | 0.6    |

Appendix A7. Data used for model parameters with regards to milk production. B = buffalo. C = cattle.

| Parameter                                    | Category | Farming system          |     |                             |     |                  |      |            |       |           |        |      | Data source                                |
|----------------------------------------------|----------|-------------------------|-----|-----------------------------|-----|------------------|------|------------|-------|-----------|--------|------|--------------------------------------------|
|                                              |          | Smallholder subsistence |     | Smallholder market-oriented |     | Rural Commercial |      | Peri-urban |       | Corporate | Desert |      |                                            |
|                                              |          | B                       | C   | B                           | C   | B                | C    | B          | C     | C         | B      | C    |                                            |
| Proportion of cows lactating                 | min      | 0.4                     | 0.4 | 0.4                         | 0.4 | 0.58             | 0.55 | 0.48       | 0.04  | 0.55      | 0.4    | 0.4  | Expert opinion                             |
|                                              | max      | 0.5                     | 0.5 | 0.5                         | 0.5 | 0.75             | 0.65 | 0.6        | 0.04  | 0.65      | 0.5    | 0.5  |                                            |
| Daily milk yield - non-cases                 | min      |                         |     |                             |     |                  |      |            |       | 20        | 2.4    | 2.35 | Expert opinion                             |
|                                              | mode     |                         |     |                             |     |                  |      |            |       | 25        |        |      |                                            |
|                                              | max      |                         |     |                             |     |                  |      |            |       | 35        | 4      | 4    |                                            |
|                                              | mean     | 7.17                    | 6.6 | 7.17                        | 6.6 | 8.91             | 9.09 | 9.95       | 12.56 |           |        |      | Ferrari et al., 2013                       |
|                                              | sd       | 3.7                     | 3.2 | 3.7                         | 3.2 | 2.82             | 3.22 | 2.25       | 3.03  |           |        |      |                                            |
| Daily milk yield - cases (disease phase)     | min      |                         |     |                             |     |                  |      |            |       | 6.2       | 0.7    | 0.75 | Expert opinion; Farooq et al, 2009         |
|                                              | mode     |                         |     |                             |     |                  |      |            |       | 7.8       |        |      |                                            |
|                                              | max      |                         |     |                             |     |                  |      |            |       | 10.9      | 1.3    | 1.27 |                                            |
|                                              | mean     | 1.84                    | 2.1 | 1.84                        | 2.1 | 2.52             | 2.14 | 2.67       | 3.9   |           |        |      | Ferrari et al., 2013                       |
|                                              | sd       | 1.73                    | 2.1 | 1.73                        | 2.1 | 1.65             | 1.51 | 1.78       | 1.88  |           |        |      |                                            |
| Daily milk yield - cases (recovery phase)    | min      |                         |     |                             |     |                  |      |            |       | 11.7      | 1.5    | 1.53 | Expert opinion                             |
|                                              | mode     |                         |     |                             |     |                  |      |            |       | 14.6      |        |      |                                            |
|                                              | max      |                         |     |                             |     |                  |      |            |       | 20.4      | 2.6    | 2.61 |                                            |
|                                              | mean     | 3.97                    | 4.3 | 3.97                        | 4.3 | 4.47             | 4.25 | 4.73       | 7.32  |           |        |      | Ferrari et al., 2013                       |
|                                              | sd       | 2.17                    | 2.6 | 2.17                        | 2.6 | 2.56             | 2.47 | 1.92       | 3.12  |           |        |      |                                            |
| Duration of milk drop (days, disease phase)  | min      | 7                       | 7   | 7                           | 7   | 7                | 7    | 7          | 7     | 7         | 7      | 7    | Ferrari et al., 2013 and author assumption |
|                                              | max      | 10                      | 10  | 10                          | 10  | 10               | 10   | 10         | 10    | 10        | 10     | 10   |                                            |
| Duration of milk drop (days, recovery phase) | min      | 10                      | 10  | 10                          | 10  | 10               | 10   | 10         | 10    | 10        | 10     | 10   | Ferrari et al., 2013 and author assumption |
|                                              | mode     | 30                      | 30  | 30                          | 30  | 30               | 30   | 30         | 30    | 30        | 30     | 30   |                                            |
|                                              | max      | 50                      | 50  | 50                          | 50  | 50               | 50   | 50         | 50    | 50        | 50     | 50   |                                            |
| Milk price per litre                         | min      | 80                      | 65  | 80                          | 65  | 80               | 65   | 80         | 65    | 65        | 80     | 65   | Expert opinion                             |
|                                              | mode     | 125                     | 95  | 125                         | 95  | 125              | 95   | 125        | 95    | 95        | 125    | 95   |                                            |
|                                              | max      | 145                     | 115 | 145                         | 115 | 145              | 115  | 145        | 115   | 115       | 145    | 115  |                                            |

Appendix A8. Data used for treatment costs of cattle and buffalo (PKR) stratified by age-sex category. B = buffalo. C = cattle.

| Age-sex category      | Category | Farming system          |      |                             |      |                  |      |            |      |           |        |      | Data source         |
|-----------------------|----------|-------------------------|------|-----------------------------|------|------------------|------|------------|------|-----------|--------|------|---------------------|
|                       |          | Smallholder subsistence |      | Smallholder market-oriented |      | Rural Commercial |      | Peri-urban |      | Corporate | Desert |      |                     |
|                       |          | B                       | C    | B                           | C    | B                | C    | B          | C    | C         | B      | C    |                     |
| <1 year               | Min      | 2500                    | 2500 | 2500                        | 3000 | 3000             | 3000 | 4000       | 4000 | 2000      | 2500   | 2500 | Expert opinion      |
|                       | Mode     | 3500                    | 3500 | 3500                        | 3500 | 3500             | 3500 | 5000       | 5000 | 2500      | 3500   | 3500 |                     |
|                       | Max      | 4500                    | 4500 | 4500                        | 4000 | 4000             | 4000 | 5000       | 5000 | 3000      | 4500   | 4500 |                     |
| Heifers and males >1y | Min      | 3500                    | 3500 | 3500                        | 3500 | 3500             | 3500 | 4000       | 4000 | 3000      | 3500   | 3500 | Expert opinion      |
|                       | Mode     | 5000                    | 5000 | 5000                        | 4000 | 4000             | 4000 | 5000       | 5000 | 3000      | 5000   | 5000 |                     |
|                       | Max      | 5500                    | 5500 | 5500                        | 4500 | 4500             | 4500 | 5000       | 5000 | 3000      | 5500   | 5500 |                     |
| Cows                  | Mean     | 1087                    | 1087 | 1087                        | 1087 | 1087             | 850  | 2229       | 1204 | 1204      | 1087   | 1087 | (Shah et al., 2014) |
|                       | sd       | 992                     | 992  | 992                         | 992  | 992              | 405  | 1753       | 394  | 394       | 992    | 992  |                     |

#### Beef feedlots

Table A9. Parameters and data used in the beef feedlot model, based on expert opinion from 5 feedlot farms in Punjab province, Pakistan. The figures represent the combination of expert opinions with equal weighting given to each farmer. The duration of reduced feed intakes was assumed by the author. All costs in PKR.

| Parameter                                       | Symbol                     | Number of cattle on farm (probability) |        |        |
|-------------------------------------------------|----------------------------|----------------------------------------|--------|--------|
| Herd size                                       | <i>hs</i>                  | 30                                     | 75     | 200    |
| FMD incidence                                   | <i>inc</i>                 | 0.32                                   | 0.38   | 0.44   |
| Case fatality rate                              | <i>cfr</i>                 | 0.365                                  | 0.0448 | 0.0563 |
| Treatment cost (medicines per FMD case)         | <i>tx</i>                  | 1984                                   | 2497   | 3010   |
| Labour cost (per minute)                        | <i>labour</i>              | 1.85                                   | 2.32   | 2.78   |
| Treatment time (minutes per FMD case)           | <i>tx_time</i>             | 23.6                                   | 34.9   | 42.5   |
| Finished animal value                           | <i>fvalue</i>              | 61356                                  | 61968  | 62554  |
| Finished animal value (after FMD)               | <i>fvalue<sub>c</sub></i>  | 43461                                  | 44885  | 46418  |
| Proportion of animal value as distress sale     | <i>fvalue<sub>ds</sub></i> | 0.5                                    | -      | 0.75   |
| Extended finishing time (days for FMD case)     | <i>eft</i>                 | 19.4                                   | 32.1   | 44.9   |
| Normal feed intakes (kg/day DM)                 | <i>di</i>                  | 6.3                                    | 6.5    | 6.7    |
| FMD case feed intakes (kg/day DM)               | <i>di<sub>c</sub></i>      | 0.904                                  | 1.21   | 1.51   |
| Feed cost (kg DM)                               | <i>fc</i>                  | 33.8                                   | 35.6   | 37.5   |
| Duration of reduced intakes for FMD case (days) | <i>dfmd</i>                | 3                                      | -      | 10     |
