# Supplementary material for: Economic Considerations for Advancement Through the Progressive Control Pathway: Cost–Benefit Analysis of an FMD Disease-Free Zone in Punjab Province, Pakistan
Source: Front Vet Sci. 2021 Aug 18;8:703473. doi: 10.3389/fvets.2021.703473 (PMC8416473; doi:10.3389/fvets.2021.703473)
Supplement: Supplementary Material A — Production system data. [file Data_Sheet_1.zip › Supplementary material C - Programme cost data_updated.pdf]

## Supplementary material C – Programme cost data

Table C1. Model parameters and estimates used for quantifying the cost of **vaccination**.

| Parameter                                        | Value (all costs In PKR)                      | Parameter type in model | Information source                   |
|--------------------------------------------------|-----------------------------------------------|-------------------------|--------------------------------------|
| Vaccine (aqueous adjuvanted)                     | 140/dose (makes up 80% of total vaccine used) | Fixed                   | FAO-PK                               |
| Vaccine (oil adjuvanted)                         | 180/dose (makes up 20% of total vaccine used) | Fixed                   | FAO-PK                               |
| Delivery                                         | 5-10 PKR/dose                                 | Uniform distribution    |                                      |
| Number of doses required (cattle - zone)         | 2,929,108                                     | Fixed                   | FAO-PK (data from previous campaign) |
| Number of doses required (buffalo - zone)        | 1,515,431                                     | Fixed                   | FAO-PK (data from previous campaign) |
| Number of doses required (cattle – buffer area)  | 615,962                                       | Fixed                   | FAO-PK (data from previous campaign) |
| Number of doses required (buffalo – buffer area) | 470,328                                       | Fixed                   | FAO-PK (data from previous campaign) |
| % of population as youngstock                    | 41.6%                                         | Fixed                   | Pakistan Bureau of Statistics, 2006  |

Table C2. Model parameters and estimates used for quantifying the cost of **post-vaccination monitoring**.

| Parameter                                                                | Value (all costs In PKR)     | Parameter type in model | Information source                                  |
|--------------------------------------------------------------------------|------------------------------|-------------------------|-----------------------------------------------------|
| Small-scale immunogenicity studies                                       | 2.1-4.1 million PKR          | Uniform distribution    | Expert opinion (follow up consultation with FAO-PK) |
| Number of samples tested by SP ELISA for population immunogenicity study | 1,050 (350 per serotype)     | Fixed                   | FAO-OIE PVM Guidelines (Ferrari et al., 2016)       |
| Structural protein antibody costs (per sample)                           | 1500-2000 (most likely 1700) | Betapert                | Expert opinion (staff from national laboratory)     |

Table C3. Model parameters and estimates used for quantifying the cost of **passive surveillance**.

| Parameter                                    | Value (all costs In PKR)                      | Parameter type in model | Information source                              |
|----------------------------------------------|-----------------------------------------------|-------------------------|-------------------------------------------------|
| DSA for staff attending outbreaks            | 3000-4000 (most likely 3500) per staff member | Betapert                | Expert opinion                                  |
| Travel costs to attend outbreaks             | 2000-3000 (most likely 2500)                  | Betapert                | Expert opinion                                  |
| Antigen testing costs                        | 2000-3000 (most likely 2500)                  | Betapert                | Expert opinion (staff from national laboratory) |
| Shipping costs to national lab               | 500-1500 (most likely 1000)                   | Betapert                | Expert opinion                                  |
| Shipping costs to OIE reference lab (annual) | 350,000-475,000                               | Uniform                 | Expert opinion (FAO-PK)                         |

Table C4. Model parameters and estimates used for quantifying the cost of **active surveillance**.

| Parameter                                                                 | Value (all costs In PKR) | Parameter type in model | Information source        |
|---------------------------------------------------------------------------|--------------------------|-------------------------|---------------------------|
| Sample size for NSP seroprevalence studies (50% seroprevalence in year 1) | 385 farms, 9000 samples  | Fixed                   | (Thrusfield et al., 2001) |
| Sample size for NSP seroprevalence studies (40% seroprevalence in year 2) | 369 farms, 8500 samples  | Fixed                   | (Thrusfield et al., 2001) |
| Sample size for NSP seroprevalence studies (30% seroprevalence in year 3) | 323 farms, 7500 samples  | Fixed                   | (Thrusfield et al., 2001) |
| Sample size for NSP seroprevalence studies (20% seroprevalence in year 4) | 246 farms, 5700 samples  | Fixed                   | (Thrusfield et al., 2001) |
| Sample size for NSP seroprevalence studies (10% seroprevalence in year 5) | 139 farms, 3200 samples  | Fixed                   | (Thrusfield et al., 2001) |
| Sample size for NSP seroprevalence studies (when free)                    | 300 farms, 7000 samples  | Fixed                   | (Thrusfield et al., 2001) |

|                                                            |                       |          |                    |
|------------------------------------------------------------|-----------------------|----------|--------------------|
| Number of farms visited per day for serosurvey             | 2-8 (most likely 4.5) | Betapert | Assumed by authors |
| Number of full-time veterinary officers                    | 15-25                 | Uniform  | Assumed by authors |
| Salary for field veterinary officer and assistant managers | 75,000 PKR/month      | Fixed    | FAO-PK             |

Table C5. Model parameters and estimates used for quantifying the cost of **sanitary measures**.

| Parameter                                                                   | Value (all costs In PKR)      | Parameter type in model | Information source |
|-----------------------------------------------------------------------------|-------------------------------|-------------------------|--------------------|
| Quarantine stations at border with Sindh province                           | 3-10 (most likely 5)          | Betapert                | Assumed by authors |
| Initial consultancy costs for establishing quarantine station (year 1 only) | 4.95m                         | Fixed                   | Assumed by authors |
| Cost of building quarantine station (year 2)                                | 4.2m-4.95m each               | Uniform                 | Assumed by authors |
| Maintenance costs of quarantine station (year 3 onwards)                    | 250,000-495,000 each per year | Uniform                 | Assumed by authors |

Table C6. Model parameters and estimates used for quantifying the cost of **Programme management**.

| Parameter                                                            | Value (all costs In PKR) | Parameter type in model | Information source |
|----------------------------------------------------------------------|--------------------------|-------------------------|--------------------|
| Salary for programme manager (every year)                            | 150,000 per month        | Fixed                   | Assumed by authors |
| Initial costs to establish public private partnership (year 1 only)  | 1.04m-1.85m per year     | Uniform                 | Assumed by authors |
| Ongoing costs to support public private partnership (year 2 onwards) | 1.58m-3.0m per year      | Uniform                 | Assumed by authors |
| Stakeholder communication costs (year 1 and 2 only)                  | 3.5m-5.25m per year      | Uniform                 | Assumed by authors |

|                                                  |                    |         |                    |
|--------------------------------------------------|--------------------|---------|--------------------|
| Stakeholder communication costs (year 3 onwards) | 2.0m-3.0m per year | Uniform | Assumed by authors |
|--------------------------------------------------|--------------------|---------|--------------------|

Table C7. Model parameters and estimates used for quantifying the cost of **Preparatory studies, training and capacity building**.

| Parameter                                                                                                                      | Value (all costs In PKR) | Parameter type in model | Information source |
|--------------------------------------------------------------------------------------------------------------------------------|--------------------------|-------------------------|--------------------|
| Risk assessment and value chain analysis – cost of consultants and to train staff in Pakistan (initial studies in year 1 only) | 3.85m-5.99m              | Uniform                 | Assumed by authors |
| Yearly updates to risk assessment and value chain analysis (year 2 onwards)                                                    | 625,000-1.065m per year  | Uniform                 | Assumed by authors |
| Refresher training in risk assessment and value chain analysis (every 3 years)                                                 | 1.114m-1.8m              | Uniform                 | Assumed by authors |
| Surveillance and PVM strategy development (workshops and training – year 1 only)                                               | 4.25m-7.5m               | Uniform                 | Assumed by authors |
| Research grant to establish the role of small ruminants in FMD epidemiology (year 1 only)                                      | 6.25m-10.375m            | Uniform                 | Assumed by authors |
| Training in outbreak investigation (initial training in year 1 only)                                                           | 5.623-6.875              | Uniform                 | Assumed by authors |
| Training in outbreak investigation (refresher every 3 years)                                                                   | 1.875m-3.5m              | Uniform                 | Assumed by authors |
| Laboratory training in VNT and vaccine matching                                                                                | 1.5m-3.0m                | Uniform                 | Assumed by authors |
| Establish QA system in laboratory                                                                                              | 1.5m-3.0m                | Uniform                 | Assumed by authors |

|                                                                   |                          |         |                    |
|-------------------------------------------------------------------|--------------------------|---------|--------------------|
| Refresher training in laboratory (every 3 years)                  | 850,000-1.5m             | Uniform | Assumed by authors |
| Participate in proficiency tests (every year)                     | 400,000-800,000 per year | Uniform | Assumed by authors |
| Development of preparedness and contingency plans (years 2 and 3) | 1.875m-3.75m             | Uniform | Assumed by authors |
| Building export abattoir in zone (year 2 only)                    | 671.01m                  | Fixed   | Assumed by authors |
