# Supplementary material for: Economic Considerations for Advancement Through the Progressive Control Pathway: Cost–Benefit Analysis of an FMD Disease-Free Zone in Punjab Province, Pakistan
Source: Front Vet Sci. 2021 Aug 18;8:703473. doi: 10.3389/fvets.2021.703473 (PMC8416473; doi:10.3389/fvets.2021.703473)
Supplement: Supplementary Material A — Production system data. [file Data_Sheet_1.zip › Supplementary material D - Expert opinion exercise for workshop_updated.pdf]

## **Supplementary material D**

**FMD cost model –  
Further data needed and assumptions to query**

## **1. Baseline production**

## Number of farms

1. Estimate the **number of farms** present in each **province** by **production system**. Please state the range

| Province                    | Production system             | Minimum | Maximum | Most likely | Confidence*(1-5) |
|-----------------------------|-------------------------------|---------|---------|-------------|------------------|
| Azad Jammu and Kashmir      | Smallholder subsistence       |         |         |             |                  |
|                             | Smallholder market-orientated |         |         |             |                  |
|                             | Rural commercial              |         |         |             |                  |
|                             | Peri-Urban                    |         |         |             |                  |
|                             | Corporate                     |         |         |             |                  |
|                             | Dairy colonies                |         |         |             |                  |
| Balochistan                 | Smallholder subsistence       |         |         |             |                  |
|                             | Smallholder market-orientated |         |         |             |                  |
|                             | Rural commercial              |         |         |             |                  |
|                             | Peri-Urban                    |         |         |             |                  |
|                             | Corporate                     |         |         |             |                  |
|                             | Dairy colonies                |         |         |             |                  |
| Gilgit-Baltistan            | Smallholder subsistence       |         |         |             |                  |
|                             | Smallholder market-orientated |         |         |             |                  |
|                             | Rural commercial              |         |         |             |                  |
|                             | Peri-Urban                    |         |         |             |                  |
|                             | Corporate                     |         |         |             |                  |
|                             | Dairy colonies                |         |         |             |                  |
| Islamabad Capital Territory | Smallholder subsistence       |         |         |             |                  |
|                             | Smallholder market-orientated |         |         |             |                  |
|                             | Rural commercial              |         |         |             |                  |
|                             | Peri-Urban                    |         |         |             |                  |
|                             | Corporate                     |         |         |             |                  |
|                             | Dairy colonies                |         |         |             |                  |
| Khyber Pakhtunkhwa          | Smallholder subsistence       |         |         |             |                  |
|                             | Smallholder market-orientated |         |         |             |                  |
|                             | Rural commercial              |         |         |             |                  |
|                             | Peri-Urban                    |         |         |             |                  |
|                             | Corporate                     |         |         |             |                  |
|                             | Dairy colonies                |         |         |             |                  |
| Punjab                      | Smallholder subsistence       |         |         |             |                  |
|                             | Smallholder market-orientated |         |         |             |                  |
|                             | Rural commercial              |         |         |             |                  |
|                             | Peri-Urban                    |         |         |             |                  |
|                             | Corporate                     |         |         |             |                  |
|                             | Dairy colonies                |         |         |             |                  |
| Sindh                       | Smallholder subsistence       |         |         |             |                  |
|                             | Smallholder market-orientated |         |         |             |                  |
|                             | Rural commercial              |         |         |             |                  |
|                             | Peri-Urban                    |         |         |             |                  |
|                             | Corporate                     |         |         |             |                  |
|                             | Dairy colonies                |         |         |             |                  |

## Fertility

- Below are the **fertility parameters** used in the economic model for the different production systems. If you disagree with them, indicate the parameters you think are more reasonable based on your experience. The definitions of the terms are provided.

| Parameter                                                                                                          | Production system             | Min         | Max | New min  | New max | Confidence (1-5) |
|--------------------------------------------------------------------------------------------------------------------|-------------------------------|-------------|-----|----------|---------|------------------|
| <b>Pregnancy/conception rate in COWS</b> (percentage of services that result in a successful offspring)            | Smallholder subsistence       | 20%         | 50% |          |         |                  |
|                                                                                                                    | Smallholder market-orientated | 20%         | 50% |          |         |                  |
|                                                                                                                    | Rural commercial              | 20%         | 50% |          |         |                  |
|                                                                                                                    | Peri-Urban                    | No breeding |     |          |         |                  |
|                                                                                                                    | Corporate                     | 20%         | 50% |          |         |                  |
|                                                                                                                    | Dairy colonies                | No breeding |     |          |         |                  |
| <b>Pregnancy/conception rate in HEIFERS</b> (percentage of services that result in a successful offspring)         | Smallholder subsistence       | 30%         | 70% |          |         |                  |
|                                                                                                                    | Smallholder market-orientated | 30%         | 70% |          |         |                  |
|                                                                                                                    | Rural commercial              | 30%         | 70% |          |         |                  |
|                                                                                                                    | Peri-Urban                    | No breeding |     |          |         |                  |
|                                                                                                                    | Corporate                     | 30%         | 70% |          |         |                  |
|                                                                                                                    | Dairy colonies                | No breeding |     |          |         |                  |
| <b>Heat detection rate in COWS</b> (percentage of oestrus events that are served – either through AI or a bull)    | Smallholder subsistence       | 20%         | 60% |          |         |                  |
|                                                                                                                    | Smallholder market-orientated | 20%         | 60% |          |         |                  |
|                                                                                                                    | Rural commercial              | 20%         | 60% |          |         |                  |
|                                                                                                                    | Peri-Urban                    | No breeding |     |          |         |                  |
|                                                                                                                    | Corporate                     | 40%         | 70% |          |         |                  |
|                                                                                                                    | Dairy colonies                | No breeding |     |          |         |                  |
| <b>Heat detection rate in HEIFERS</b> (percentage of oestrus events that are served – either through AI or a bull) | Smallholder subsistence       | 30%         |     | 70%      |         |                  |
|                                                                                                                    | Smallholder market-orientated | 30%         |     | 70%      |         |                  |
|                                                                                                                    | Rural commercial              | 30%         |     | 70%      |         |                  |
|                                                                                                                    | Peri-Urban                    | No breeding |     |          |         |                  |
|                                                                                                                    | Corporate                     | 50%         |     | 80%      |         |                  |
|                                                                                                                    | Dairy colonies                | No breeding |     |          |         |                  |
| <b>Voluntary waiting period</b> (number of days after calving that farms will <b>start</b> breeding cows)          | Smallholder subsistence       | 60 days     |     | 150 days |         |                  |
|                                                                                                                    | Smallholder market-orientated | 60 days     |     | 150 days |         |                  |
|                                                                                                                    | Rural commercial              | 60 days     |     | 150 days |         |                  |
|                                                                                                                    | Peri-Urban                    | No breeding |     |          |         |                  |
|                                                                                                                    | Corporate                     | 60 days     |     | 80 days  |         |                  |
|                                                                                                                    | Dairy colonies                | No breeding |     |          |         |                  |

## Mortality rates

1. Please estimate the **baseline mortality estimates** for the different animal types by production system. Please give the **annual % expected mortality**.

| System                        | Animal category             | Minimum % | Maximum % | Most likely % | Confidence*(1-5) |
|-------------------------------|-----------------------------|-----------|-----------|---------------|------------------|
| Smallholder subsistence       | Male calves (<1 year old)   |           |           |               |                  |
|                               | Female calves (<1 year old) |           |           |               |                  |
|                               | Bulls (>1 year old)         |           |           |               |                  |
|                               | Heifers (>1 year old)       |           |           |               |                  |
|                               | Cows                        |           |           |               |                  |
| Smallholder market-orientated | Male calves (<1 year old)   |           |           |               |                  |
|                               | Female calves (<1 year old) |           |           |               |                  |
|                               | Bulls (>1 year old)         |           |           |               |                  |
|                               | Heifers (>1 year old)       |           |           |               |                  |
|                               | Cows                        |           |           |               |                  |
| Rural commercial              | Male calves (<1 year old)   |           |           |               |                  |
|                               | Female calves (<1 year old) |           |           |               |                  |
|                               | Bulls (>1 year old)         |           |           |               |                  |
|                               | Heifers (>1 year old)       |           |           |               |                  |
|                               | Cows                        |           |           |               |                  |
| Peri-Urban                    | Male calves (<1 year old)   |           |           |               |                  |
|                               | Female calves (<1 year old) |           |           |               |                  |
|                               | Bulls (>1 year old)         |           |           |               |                  |
|                               | Heifers (>1 year old)       |           |           |               |                  |
|                               | Cows                        |           |           |               |                  |
| Corporate                     | Male calves (<1 year old)   |           |           |               |                  |
|                               | Female calves (<1 year old) |           |           |               |                  |
|                               | Bulls (>1 year old)         |           |           |               |                  |
|                               | Heifers (>1 year old)       |           |           |               |                  |
|                               | Cows                        |           |           |               |                  |
| Dairy colonies                | Male calves (<1 year old)   |           |           |               |                  |
|                               | Female calves (<1 year old) |           |           |               |                  |
|                               | Bulls (>1 year old)         |           |           |               |                  |
|                               | Heifers (>1 year old)       |           |           |               |                  |
|                               | Cows                        |           |           |               |                  |

## Offtake rates

1. Please estimate the **baseline offtake rates** for the different animal types by production system. Please give the annual % of animals that will be sold (this could be due to culling or to generate revenue as part of normal farm policy).

| System                        | Animal category             | Minimum % | Maximum % | Most likely % | Confidence*(1-5) |
|-------------------------------|-----------------------------|-----------|-----------|---------------|------------------|
| Smallholder subsistence       | Male calves (<1 year old)   |           |           |               |                  |
|                               | Female calves (<1 year old) |           |           |               |                  |
|                               | Bulls (>1 year old)         |           |           |               |                  |
|                               | Heifers (>1 year old)       |           |           |               |                  |
|                               | Cows                        |           |           |               |                  |
| Smallholder market-orientated | Male calves (<1 year old)   |           |           |               |                  |
|                               | Female calves (<1 year old) |           |           |               |                  |
|                               | Bulls (>1 year old)         |           |           |               |                  |
|                               | Heifers (>1 year old)       |           |           |               |                  |
|                               | Cows                        |           |           |               |                  |
| Rural commercial              | Male calves (<1 year old)   |           |           |               |                  |
|                               | Female calves (<1 year old) |           |           |               |                  |
|                               | Bulls (>1 year old)         |           |           |               |                  |
|                               | Heifers (>1 year old)       |           |           |               |                  |
|                               | Cows                        |           |           |               |                  |
| Peri-Urban                    | Male calves (<1 year old)   |           |           |               |                  |
|                               | Female calves (<1 year old) |           |           |               |                  |
|                               | Bulls (>1 year old)         |           |           |               |                  |
|                               | Heifers (>1 year old)       |           |           |               |                  |
|                               | Cows                        |           |           |               |                  |
| Corporate                     | Male calves (<1 year old)   |           |           |               |                  |
|                               | Female calves (<1 year old) |           |           |               |                  |
|                               | Bulls (>1 year old)         |           |           |               |                  |
|                               | Heifers (>1 year old)       |           |           |               |                  |
|                               | Cows                        |           |           |               |                  |
| Dairy colonies                | Male calves (<1 year old)   |           |           |               |                  |
|                               | Female calves (<1 year old) |           |           |               |                  |
|                               | Bulls (>1 year old)         |           |           |               |                  |
|                               | Heifers (>1 year old)       |           |           |               |                  |
|                               | Cows                        |           |           |               |                  |

## Animal prices

- Below are the **estimated livestock prices** used in the economic model for the different production systems. If you disagree with them, indicate the parameters you think are more reasonable based on your experience. The definitions of the terms are provided.

### Animal prices - BUFFALO

| Parameter          | Production system             | Min        | Max    | New min | New max | Confidence (1-5) |
|--------------------|-------------------------------|------------|--------|---------|---------|------------------|
| Female calf (<1yo) | Smallholder subsistence       | 10,000     | 15000  |         |         |                  |
|                    | Smallholder market-orientated | 10,000     | 15000  |         |         |                  |
|                    | Rural commercial              | 10,000     | 15000  |         |         |                  |
|                    | Peri-Urban                    | 10,000     | 15000  |         |         |                  |
|                    | Corporate                     | No buffalo |        |         |         |                  |
|                    | Dairy colonies                | 10,000     | 15000  |         |         |                  |
| Male calf (<1yo)   | Smallholder subsistence       | 10,000     | 15000  |         |         |                  |
|                    | Smallholder market-orientated | 10,000     | 15000  |         |         |                  |
|                    | Rural commercial              | 10,000     | 15000  |         |         |                  |
|                    | Peri-Urban                    | 10,000     | 15000  |         |         |                  |
|                    | Corporate                     | No buffalo |        |         |         |                  |
|                    | Dairy colonies                | 10,000     | 15000  |         |         |                  |
| Male (>1yo)        | Smallholder subsistence       | 75,000     | 80,000 |         |         |                  |
|                    | Smallholder market-orientated | 75,000     | 80,000 |         |         |                  |
|                    | Rural commercial              | 75,000     | 80,000 |         |         |                  |
|                    | Peri-Urban                    | 75,000     | 80,000 |         |         |                  |
|                    | Corporate                     | No buffalo |        |         |         |                  |
|                    | Dairy colonies                | 75,000     | 80,000 |         |         |                  |
| Heifer (1-2yo)     | Smallholder subsistence       | 75,000     | 80,000 |         |         |                  |
|                    | Smallholder market-orientated | 75,000     | 80,000 |         |         |                  |
|                    | Rural commercial              | 75,000     | 80,000 |         |         |                  |
|                    | Peri-Urban                    | 75,000     | 80,000 |         |         |                  |
|                    | Corporate                     | No buffalo |        |         |         |                  |
|                    | Dairy colonies                | 75,000     | 80,000 |         |         |                  |
| Heifer (2-3yo)     | Smallholder subsistence       | 75,000     | 80,000 |         |         |                  |
|                    | Smallholder market-orientated | 75,000     | 80,000 |         |         |                  |
|                    | Rural commercial              | 75,000     | 80,000 |         |         |                  |
|                    | Peri-Urban                    | 75,000     | 80,000 |         |         |                  |
|                    | Corporate                     | No buffalo |        |         |         |                  |
|                    | Dairy colonies                | 75,000     | 80,000 |         |         |                  |
| Heifer (3-4yo)     | Smallholder subsistence       | 75,000     | 80,000 |         |         |                  |
|                    | Smallholder market-orientated | 75,000     | 80,000 |         |         |                  |
|                    | Rural commercial              | 75,000     | 80,000 |         |         |                  |
|                    | Peri-Urban                    | 75,000     | 80,000 |         |         |                  |
|                    | Corporate                     | No buffalo |        |         |         |                  |
|                    | Dairy colonies                | 75,000     | 80,000 |         |         |                  |

|                |                               |            |         |  |  |  |
|----------------|-------------------------------|------------|---------|--|--|--|
| Heifer (4-5yo) | Smallholder subsistence       | 75,000     | 80,000  |  |  |  |
|                | Smallholder market-orientated | 75,000     | 80,000  |  |  |  |
|                | Rural commercial              | 75,000     | 80,000  |  |  |  |
|                | Peri-Urban                    | 75,000     | 80,000  |  |  |  |
|                | Corporate                     | No buffalo |         |  |  |  |
|                | Dairy colonies                | 75,000     | 80,000  |  |  |  |
| Cow            | Smallholder subsistence       | 140,000    | 215,000 |  |  |  |
|                | Smallholder market-orientated | 140,000    | 215,000 |  |  |  |
|                | Rural commercial              | 140,000    | 215,000 |  |  |  |
|                | Peri-Urban                    | 140,000    | 215,000 |  |  |  |
|                | Corporate                     | No buffalo |         |  |  |  |
|                | Dairy colonies                | 140,000    | 215,000 |  |  |  |

### ***Animal prices - CATTLE***

| Parameter          | Production system             | Min       | Max    | New min | New max | Confidence (1-5) |
|--------------------|-------------------------------|-----------|--------|---------|---------|------------------|
| Female calf (<1yo) | Smallholder subsistence       | No cattle |        |         |         |                  |
|                    | Smallholder market-orientated | No cattle |        |         |         |                  |
|                    | Rural commercial              | 10,000    | 15000  |         |         |                  |
|                    | Peri-Urban                    | 10,000    | 15000  |         |         |                  |
|                    | Corporate                     | 10,000    | 15000  |         |         |                  |
|                    | Dairy colonies                | 10,000    | 15000  |         |         |                  |
| Male calf (<1yo)   | Smallholder subsistence       | No cattle |        |         |         |                  |
|                    | Smallholder market-orientated | No cattle |        |         |         |                  |
|                    | Rural commercial              | 10,000    | 15000  |         |         |                  |
|                    | Peri-Urban                    | 10,000    | 15000  |         |         |                  |
|                    | Corporate                     | 10,000    | 15000  |         |         |                  |
|                    | Dairy colonies                | 10,000    | 15000  |         |         |                  |
| Male (>1yo)        | Smallholder subsistence       | No cattle |        |         |         |                  |
|                    | Smallholder market-orientated | No cattle |        |         |         |                  |
|                    | Rural commercial              | 75,000    | 80,000 |         |         |                  |
|                    | Peri-Urban                    | 75,000    | 80,000 |         |         |                  |
|                    | Corporate                     | 75,000    | 80,000 |         |         |                  |
|                    | Dairy colonies                | 75,000    | 80,000 |         |         |                  |
| Heifer (1-2yo)     | Smallholder subsistence       | No cattle |        |         |         |                  |
|                    | Smallholder market-orientated | No cattle |        |         |         |                  |
|                    | Rural commercial              | 75,000    | 80,000 |         |         |                  |
|                    | Peri-Urban                    | 75,000    | 80,000 |         |         |                  |
|                    | Corporate                     | 75,000    | 80,000 |         |         |                  |
|                    | Dairy colonies                | 75,000    | 80,000 |         |         |                  |
| Heifer (2-3yo)     | Smallholder subsistence       | No cattle |        |         |         |                  |
|                    | Smallholder market-orientated | No cattle |        |         |         |                  |
|                    | Rural commercial              | 75,000    | 80,000 |         |         |                  |
|                    | Peri-Urban                    | 75,000    | 80,000 |         |         |                  |
|                    | Corporate                     | 75,000    | 80,000 |         |         |                  |
|                    | Dairy colonies                | 75,000    | 80,000 |         |         |                  |
| Heifer (3-4yo)     | Smallholder subsistence       | No cattle |        |         |         |                  |
|                    | Smallholder market-orientated | No cattle |        |         |         |                  |
|                    | Rural commercial              | 75,000    | 80,000 |         |         |                  |
|                    | Peri-Urban                    | 75,000    | 80,000 |         |         |                  |
|                    | Corporate                     | 75,000    | 80,000 |         |         |                  |
|                    | Dairy colonies                | 75,000    | 80,000 |         |         |                  |
| Heifer (4-5yo)     | Smallholder subsistence       | No cattle |        |         |         |                  |
|                    | Smallholder market-orientated | No cattle |        |         |         |                  |
|                    | Rural commercial              | 75,000    | 80,000 |         |         |                  |
|                    | Peri-Urban                    | 75,000    | 80,000 |         |         |                  |
|                    | Corporate                     | 75,000    | 80,000 |         |         |                  |
|                    | Dairy colonies                | 75,000    | 80,000 |         |         |                  |

|     |                               |           |         |  |  |  |
|-----|-------------------------------|-----------|---------|--|--|--|
| Cow | Smallholder subsistence       | No cattle |         |  |  |  |
|     | Smallholder market-orientated | No cattle |         |  |  |  |
|     | Rural commercial              | 140,000   | 215,000 |  |  |  |
|     | Peri-Urban                    | 140,000   | 215,000 |  |  |  |
|     | Corporate                     | 140,000   | 215,000 |  |  |  |
|     | Dairy colonies                | 140,000   | 215,000 |  |  |  |

## Lactating cows

1. Among the different production systems, what is the range in the **percentage of cows are lactating** (as opposed to dry, not including heifers)? Below are the parameters used in the model. If you disagree with them, indicate what you think and how confident you are in your estimate.

| Species | Production system             | Min %      | Max % | New min % | New max % | Confidence (1-5) |
|---------|-------------------------------|------------|-------|-----------|-----------|------------------|
| Buffalo | Smallholder subsistence       | 40         | 50    |           |           |                  |
|         | Smallholder market-orientated | 40         | 50    |           |           |                  |
|         | Rural commercial              | 50         | 60    |           |           |                  |
|         | Peri-Urban                    | 90         | 100   |           |           |                  |
|         | Corporate                     | No buffalo |       |           |           |                  |
|         | Dairy colonies                | 90         | 100   |           |           |                  |
| Cattle  | Smallholder subsistence       | No cattle  |       |           |           |                  |
|         | Smallholder market-orientated | No cattle  |       |           |           |                  |
|         | Rural commercial              | 50         | 60    |           |           |                  |
|         | Peri-Urban                    | 90         | 100   |           |           |                  |
|         | Corporate                     | 60         | 70    |           |           |                  |
|         | Dairy colonies                | 90         | 100   |           |           |                  |

## Milk yields

1. Among the different production systems, what is a typical **milk yield** (litres/cow/day)?

| Species | Production system             | Min (litres/cow/day) | Max (litres/cow/day) | Most likely (litres/cow/day) | Confidence (1-5) |
|---------|-------------------------------|----------------------|----------------------|------------------------------|------------------|
| Buffalo | Smallholder subsistence       |                      |                      |                              |                  |
|         | Smallholder market-orientated |                      |                      |                              |                  |
|         | Rural commercial              |                      |                      |                              |                  |
|         | Peri-Urban                    |                      |                      |                              |                  |
|         | Corporate                     | No buffalo           |                      |                              |                  |
|         | Dairy colonies                |                      |                      |                              |                  |
| Cattle  | Smallholder subsistence       | No cattle            |                      |                              |                  |
|         | Smallholder market-orientated | No cattle            |                      |                              |                  |
|         | Rural commercial              |                      |                      |                              |                  |
|         | Peri-Urban                    |                      |                      |                              |                  |
|         | Corporate                     |                      |                      |                              |                  |
|         | Dairy colonies                |                      |                      |                              |                  |

## Milk price

1. What is the milk price for milk sold in different production systems?

| Species | Production system             | Min<br>(PKR/litre) | Max<br>(PKR/litre) | Most likely<br>(PKR/litre) | Confidence (1-5) |
|---------|-------------------------------|--------------------|--------------------|----------------------------|------------------|
| Buffalo | Smallholder subsistence       | No milk sold       |                    |                            |                  |
|         | Smallholder market-orientated |                    |                    |                            |                  |
|         | Rural commercial              |                    |                    |                            |                  |
|         | Peri-Urban                    |                    |                    |                            |                  |
|         | Corporate                     | No buffalo         |                    |                            |                  |
|         | Dairy colonies                |                    |                    |                            |                  |
| Cattle  | Smallholder subsistence       | No cattle          |                    |                            |                  |
|         | Smallholder market-orientated | No cattle          |                    |                            |                  |
|         | Rural commercial              |                    |                    |                            |                  |
|         | Peri-Urban                    |                    |                    |                            |                  |
|         | Corporate                     |                    |                    |                            |                  |
|         | Dairy colonies                |                    |                    |                            |                  |

## Draught power

### 1. What percentage of farms use **draught power**?

| Province                    | Production system             | Minimum | Maximum | Most likely | Confidence*(1-5) |
|-----------------------------|-------------------------------|---------|---------|-------------|------------------|
| Azad Jammu and Kashmir      | Smallholder subsistence       |         |         |             |                  |
|                             | Smallholder market-orientated |         |         |             |                  |
|                             | Rural commercial              |         |         |             |                  |
|                             | Peri-Urban                    |         |         |             |                  |
|                             | Corporate                     |         |         |             |                  |
|                             | Dairy colonies                |         |         |             |                  |
| Balochistan                 | Smallholder subsistence       |         |         |             |                  |
|                             | Smallholder market-orientated |         |         |             |                  |
|                             | Rural commercial              |         |         |             |                  |
|                             | Peri-Urban                    |         |         |             |                  |
|                             | Corporate                     |         |         |             |                  |
|                             | Dairy colonies                |         |         |             |                  |
| Gilgit-Baltistan            | Smallholder subsistence       |         |         |             |                  |
|                             | Smallholder market-orientated |         |         |             |                  |
|                             | Rural commercial              |         |         |             |                  |
|                             | Peri-Urban                    |         |         |             |                  |
|                             | Corporate                     |         |         |             |                  |
|                             | Dairy colonies                |         |         |             |                  |
| Islamabad Capital Territory | Smallholder subsistence       |         |         |             |                  |
|                             | Smallholder market-orientated |         |         |             |                  |
|                             | Rural commercial              |         |         |             |                  |
|                             | Peri-Urban                    |         |         |             |                  |
|                             | Corporate                     |         |         |             |                  |
|                             | Dairy colonies                |         |         |             |                  |
| Khyber Pakhtunkhwa          | Smallholder subsistence       |         |         |             |                  |
|                             | Smallholder market-orientated |         |         |             |                  |
|                             | Rural commercial              |         |         |             |                  |
|                             | Peri-Urban                    |         |         |             |                  |
|                             | Corporate                     |         |         |             |                  |
|                             | Dairy colonies                |         |         |             |                  |
| Punjab                      | Smallholder subsistence       |         |         |             |                  |
|                             | Smallholder market-orientated |         |         |             |                  |
|                             | Rural commercial              |         |         |             |                  |
|                             | Peri-Urban                    |         |         |             |                  |
|                             | Corporate                     |         |         |             |                  |
|                             | Dairy colonies                |         |         |             |                  |
| Sindh                       | Smallholder subsistence       |         |         |             |                  |
|                             | Smallholder market-orientated |         |         |             |                  |
|                             | Rural commercial              |         |         |             |                  |
|                             | Peri-Urban                    |         |         |             |                  |
|                             | Corporate                     |         |         |             |                  |
|                             | Dairy colonies                |         |         |             |                  |

## **2. FMD Incidence**

## Reported outbreaks

1. Estimate the ***number of reported outbreaks*** per year by production system in each province

| Province                    | Production system             | Minimum | Maximum | Most likely | Confidence*(1-5) |
|-----------------------------|-------------------------------|---------|---------|-------------|------------------|
| Azad Jammu and Kashmir      | Smallholder subsistence       |         |         |             |                  |
|                             | Smallholder market-orientated |         |         |             |                  |
|                             | Rural commercial              |         |         |             |                  |
|                             | Peri-Urban                    |         |         |             |                  |
|                             | Corporate                     |         |         |             |                  |
|                             | Dairy colonies                |         |         |             |                  |
| Balochistan                 | Smallholder subsistence       |         |         |             |                  |
|                             | Smallholder market-orientated |         |         |             |                  |
|                             | Rural commercial              |         |         |             |                  |
|                             | Peri-Urban                    |         |         |             |                  |
|                             | Corporate                     |         |         |             |                  |
|                             | Dairy colonies                |         |         |             |                  |
| Gilgit-Baltistan            | Smallholder subsistence       |         |         |             |                  |
|                             | Smallholder market-orientated |         |         |             |                  |
|                             | Rural commercial              |         |         |             |                  |
|                             | Peri-Urban                    |         |         |             |                  |
|                             | Corporate                     |         |         |             |                  |
|                             | Dairy colonies                |         |         |             |                  |
| Islamabad Capital Territory | Smallholder subsistence       |         |         |             |                  |
|                             | Smallholder market-orientated |         |         |             |                  |
|                             | Rural commercial              |         |         |             |                  |
|                             | Peri-Urban                    |         |         |             |                  |
|                             | Corporate                     |         |         |             |                  |
|                             | Dairy colonies                |         |         |             |                  |
| Khyber Pakhtunkhwa          | Smallholder subsistence       |         |         |             |                  |
|                             | Smallholder market-orientated |         |         |             |                  |
|                             | Rural commercial              |         |         |             |                  |
|                             | Peri-Urban                    |         |         |             |                  |
|                             | Corporate                     |         |         |             |                  |
|                             | Dairy colonies                |         |         |             |                  |
| Punjab                      | Smallholder subsistence       |         |         |             |                  |
|                             | Smallholder market-orientated |         |         |             |                  |
|                             | Rural commercial              |         |         |             |                  |
|                             | Peri-Urban                    |         |         |             |                  |
|                             | Corporate                     |         |         |             |                  |
|                             | Dairy colonies                |         |         |             |                  |
| Sindh                       | Smallholder subsistence       |         |         |             |                  |
|                             | Smallholder market-orientated |         |         |             |                  |
|                             | Rural commercial              |         |         |             |                  |
|                             | Peri-Urban                    |         |         |             |                  |
|                             | Corporate                     |         |         |             |                  |
|                             | Dairy colonies                |         |         |             |                  |

Confidence scoring (1-5) with 1 = not confident and 5 = very confident

## Outbreak reporting

2. What **percentage** of all outbreaks are actually **reported**? Please give your estimates by province and production system.

| Province                    | Production system             | Minimum | Maximum | Most likely | Confidence* (1-5) |
|-----------------------------|-------------------------------|---------|---------|-------------|-------------------|
| Azad Jammu and Kashmir      | Smallholder subsistence       |         |         |             |                   |
|                             | Smallholder market-orientated |         |         |             |                   |
|                             | Rural commercial              |         |         |             |                   |
|                             | Peri-Urban                    |         |         |             |                   |
|                             | Corporate                     |         |         |             |                   |
|                             | Dairy colonies                |         |         |             |                   |
| Balochistan                 | Smallholder subsistence       |         |         |             |                   |
|                             | Smallholder market-orientated |         |         |             |                   |
|                             | Rural commercial              |         |         |             |                   |
|                             | Peri-Urban                    |         |         |             |                   |
|                             | Corporate                     |         |         |             |                   |
|                             | Dairy colonies                |         |         |             |                   |
| Gilgit-Baltistan            | Smallholder subsistence       |         |         |             |                   |
|                             | Smallholder market-orientated |         |         |             |                   |
|                             | Rural commercial              |         |         |             |                   |
|                             | Peri-Urban                    |         |         |             |                   |
|                             | Corporate                     |         |         |             |                   |
|                             | Dairy colonies                |         |         |             |                   |
| Islamabad Capital Territory | Smallholder subsistence       |         |         |             |                   |
|                             | Smallholder market-orientated |         |         |             |                   |
|                             | Rural commercial              |         |         |             |                   |
|                             | Peri-Urban                    |         |         |             |                   |
|                             | Corporate                     |         |         |             |                   |
|                             | Dairy colonies                |         |         |             |                   |
| Khyber Pakhtunkhwa          | Smallholder subsistence       |         |         |             |                   |
|                             | Smallholder market-orientated |         |         |             |                   |
|                             | Rural commercial              |         |         |             |                   |
|                             | Peri-Urban                    |         |         |             |                   |
|                             | Corporate                     |         |         |             |                   |
|                             | Dairy colonies                |         |         |             |                   |
| Punjab                      | Smallholder subsistence       |         |         |             |                   |
|                             | Smallholder market-orientated |         |         |             |                   |
|                             | Rural commercial              |         |         |             |                   |
|                             | Peri-Urban                    |         |         |             |                   |
|                             | Corporate                     |         |         |             |                   |
|                             | Dairy colonies                |         |         |             |                   |
| Sindh                       | Smallholder subsistence       |         |         |             |                   |
|                             | Smallholder market-orientated |         |         |             |                   |
|                             | Rural commercial              |         |         |             |                   |
|                             | Peri-Urban                    |         |         |             |                   |
|                             | Corporate                     |         |         |             |                   |
|                             | Dairy colonies                |         |         |             |                   |

## FMD case incidence

1. The incidence by age presented by Ferrari et al (2013) is used in the model. Please indicate if you think this varies by different production systems in the table below.

| System                        | Animal category             | Incidence % | Maximum % | Most likely % | Confidence*(1-5) |
|-------------------------------|-----------------------------|-------------|-----------|---------------|------------------|
| Smallholder subsistence       | Male calves (<1 year old)   |             |           |               |                  |
|                               | Female calves (<1 year old) |             |           |               |                  |
|                               | Bulls (>1 year old)         |             |           |               |                  |
|                               | Heifers (>1 year old)       |             |           |               |                  |
|                               | Cows                        |             |           |               |                  |
| Smallholder market-orientated | Male calves (<1 year old)   |             |           |               |                  |
|                               | Female calves (<1 year old) |             |           |               |                  |
|                               | Bulls (>1 year old)         |             |           |               |                  |
|                               | Heifers (>1 year old)       |             |           |               |                  |
|                               | Cows                        |             |           |               |                  |
| Rural commercial              | Male calves (<1 year old)   |             |           |               |                  |
|                               | Female calves (<1 year old) |             |           |               |                  |
|                               | Bulls (>1 year old)         |             |           |               |                  |
|                               | Heifers (>1 year old)       |             |           |               |                  |
|                               | Cows                        |             |           |               |                  |
| Peri-Urban                    | Male calves (<1 year old)   |             |           |               |                  |
|                               | Female calves (<1 year old) |             |           |               |                  |
|                               | Bulls (>1 year old)         |             |           |               |                  |
|                               | Heifers (>1 year old)       |             |           |               |                  |
|                               | Cows                        |             |           |               |                  |
| Corporate                     | Male calves (<1 year old)   |             |           |               |                  |
|                               | Female calves (<1 year old) |             |           |               |                  |
|                               | Bulls (>1 year old)         |             |           |               |                  |
|                               | Heifers (>1 year old)       |             |           |               |                  |
|                               | Cows                        |             |           |               |                  |
| Dairy colonies                | Male calves (<1 year old)   |             |           |               |                  |
|                               | Female calves (<1 year old) |             |           |               |                  |
|                               | Bulls (>1 year old)         |             |           |               |                  |
|                               | Heifers (>1 year old)       |             |           |               |                  |
|                               | Cows                        |             |           |               |                  |

### **3. Impact of FMD cases**

## Distress sales

1. What percentage of FMD cases are sold as **distress sales**? Below is the range used in the current economic model. If you disagree, please insert the new numbers in the columns provided.

### ***Distress sales - BUFFALO***

| System                        | Animal category             | Min % | Max % | New min (%) | New max (%) | Confidence* (1-5) |
|-------------------------------|-----------------------------|-------|-------|-------------|-------------|-------------------|
| Smallholder subsistence       | Male calves (<1 year old)   | 0     | 10    |             |             |                   |
|                               | Female calves (<1 year old) | 0     | 10    |             |             |                   |
|                               | Bulls (>1 year old)         | 0     | 10    |             |             |                   |
|                               | Heifers (>1 year old)       | 0     | 10    |             |             |                   |
|                               | Cows                        | 0     | 10    |             |             |                   |
| Smallholder market-orientated | Male calves (<1 year old)   | 0     | 10    |             |             |                   |
|                               | Female calves (<1 year old) | 0     | 10    |             |             |                   |
|                               | Bulls (>1 year old)         | 0     | 10    |             |             |                   |
|                               | Heifers (>1 year old)       | 0     | 10    |             |             |                   |
|                               | Cows                        | 0     | 10    |             |             |                   |
| Rural commercial              | Male calves (<1 year old)   | 0     | 10    |             |             |                   |
|                               | Female calves (<1 year old) | 0     | 10    |             |             |                   |
|                               | Bulls (>1 year old)         | 0     | 10    |             |             |                   |
|                               | Heifers (>1 year old)       | 0     | 10    |             |             |                   |
|                               | Cows                        | 0     | 10    |             |             |                   |
| Peri-Urban                    | Male calves (<1 year old)   | 0     | 20    |             |             |                   |
|                               | Female calves (<1 year old) | 0     | 20    |             |             |                   |
|                               | Bulls (>1 year old)         | 0     | 20    |             |             |                   |
|                               | Heifers (>1 year old)       | 0     | 20    |             |             |                   |
|                               | Cows                        | 0     | 20    |             |             |                   |
| Corporate                     | Male calves (<1 year old)   | 0     | 5     |             |             |                   |
|                               | Female calves (<1 year old) | 0     | 5     |             |             |                   |
|                               | Bulls (>1 year old)         | 0     | 5     |             |             |                   |
|                               | Heifers (>1 year old)       | 0     | 5     |             |             |                   |
|                               | Cows                        | 0     | 5     |             |             |                   |
| Dairy colonies                | Male calves (<1 year old)   | 0     | 20    |             |             |                   |
|                               | Female calves (<1 year old) | 0     | 20    |             |             |                   |
|                               | Bulls (>1 year old)         | 0     | 20    |             |             |                   |
|                               | Heifers (>1 year old)       | 0     | 20    |             |             |                   |
|                               | Cows                        | 0     | 20    |             |             |                   |

### ***Distress sales - CATTLE***

| <b>System</b>                 | <b>Animal category</b>      | <b>Min %</b> | <b>Max %</b> | <b>New min (%)</b> | <b>New max (%)</b> | <b>Confidence* (1-5)</b> |
|-------------------------------|-----------------------------|--------------|--------------|--------------------|--------------------|--------------------------|
| Smallholder subsistence       | Male calves (<1 year old)   | 0            | 10           |                    |                    |                          |
|                               | Female calves (<1 year old) | 0            | 10           |                    |                    |                          |
|                               | Bulls (>1 year old)         | 0            | 10           |                    |                    |                          |
|                               | Heifers (>1 year old)       | 0            | 10           |                    |                    |                          |
|                               | Cows                        | 0            | 10           |                    |                    |                          |
| Smallholder market-orientated | Male calves (<1 year old)   | 0            | 10           |                    |                    |                          |
|                               | Female calves (<1 year old) | 0            | 10           |                    |                    |                          |
|                               | Bulls (>1 year old)         | 0            | 10           |                    |                    |                          |
|                               | Heifers (>1 year old)       | 0            | 10           |                    |                    |                          |
|                               | Cows                        | 0            | 10           |                    |                    |                          |
| Rural commercial              | Male calves (<1 year old)   | 0            | 10           |                    |                    |                          |
|                               | Female calves (<1 year old) | 0            | 10           |                    |                    |                          |
|                               | Bulls (>1 year old)         | 0            | 10           |                    |                    |                          |
|                               | Heifers (>1 year old)       | 0            | 10           |                    |                    |                          |
|                               | Cows                        | 0            | 10           |                    |                    |                          |
| Peri-Urban                    | Male calves (<1 year old)   | 0            | 20           |                    |                    |                          |
|                               | Female calves (<1 year old) | 0            | 20           |                    |                    |                          |
|                               | Bulls (>1 year old)         | 0            | 20           |                    |                    |                          |
|                               | Heifers (>1 year old)       | 0            | 20           |                    |                    |                          |
|                               | Cows                        | 0            | 20           |                    |                    |                          |
| Corporate                     | Male calves (<1 year old)   | 0            | 5            |                    |                    |                          |
|                               | Female calves (<1 year old) | 0            | 5            |                    |                    |                          |
|                               | Bulls (>1 year old)         | 0            | 5            |                    |                    |                          |
|                               | Heifers (>1 year old)       | 0            | 5            |                    |                    |                          |
|                               | Cows                        | 0            | 5            |                    |                    |                          |
| Dairy colonies                | Male calves (<1 year old)   | 0            | 20           |                    |                    |                          |
|                               | Female calves (<1 year old) | 0            | 20           |                    |                    |                          |
|                               | Bulls (>1 year old)         | 0            | 20           |                    |                    |                          |
|                               | Heifers (>1 year old)       | 0            | 20           |                    |                    |                          |
|                               | Cows                        | 0            | 20           |                    |                    |                          |



## Culling rates of FMD cases

1. What percentage of FMD cases are **culled** due to FMD? These are not distress sales which are sold when sick, rather end up being sold due to poor productivity. Below is the range used in the current economic model. If you disagree, please insert the new numbers in the columns provided.

### **FMD culling rates - BUFFALO**

| System                        | Animal category             | Min % | Max % | New min (%) | New max (%) | Confidence* (1-5) |
|-------------------------------|-----------------------------|-------|-------|-------------|-------------|-------------------|
| Smallholder subsistence       | Male calves (<1 year old)   | 0     | 0     |             |             |                   |
|                               | Female calves (<1 year old) | 0     | 0     |             |             |                   |
|                               | Bulls (>1 year old)         | 0     | 0     |             |             |                   |
|                               | Heifers (>1 year old)       | 0     | 0     |             |             |                   |
|                               | Cows                        | 0     | 5     |             |             |                   |
| Smallholder market-orientated | Male calves (<1 year old)   | 0     | 0     |             |             |                   |
|                               | Female calves (<1 year old) | 0     | 0     |             |             |                   |
|                               | Bulls (>1 year old)         | 0     | 0     |             |             |                   |
|                               | Heifers (>1 year old)       | 0     | 0     |             |             |                   |
|                               | Cows                        | 0     | 10    |             |             |                   |
| Rural commercial              | Male calves (<1 year old)   | 0     | 0     |             |             |                   |
|                               | Female calves (<1 year old) | 0     | 0     |             |             |                   |
|                               | Bulls (>1 year old)         | 0     | 0     |             |             |                   |
|                               | Heifers (>1 year old)       | 0     | 0     |             |             |                   |
|                               | Cows                        | 0     | 15    |             |             |                   |
| Peri-Urban                    | Male calves (<1 year old)   | 0     | 0     |             |             |                   |
|                               | Female calves (<1 year old) | 0     | 0     |             |             |                   |
|                               | Bulls (>1 year old)         | 0     | 0     |             |             |                   |
|                               | Heifers (>1 year old)       | 0     | 0     |             |             |                   |
|                               | Cows                        | 0     | 15    |             |             |                   |
| Corporate                     | Male calves (<1 year old)   | 0     | 0     |             |             |                   |
|                               | Female calves (<1 year old) | 0     | 0     |             |             |                   |
|                               | Bulls (>1 year old)         | 0     | 0     |             |             |                   |
|                               | Heifers (>1 year old)       | 0     | 0     |             |             |                   |
|                               | Cows                        | 0     | 10    |             |             |                   |
| Dairy colonies                | Male calves (<1 year old)   | 0     | 0     |             |             |                   |
|                               | Female calves (<1 year old) | 0     | 0     |             |             |                   |
|                               | Bulls (>1 year old)         | 0     | 0     |             |             |                   |
|                               | Heifers (>1 year old)       | 0     | 0     |             |             |                   |
|                               | Cows                        | 0     | 15    |             |             |                   |

# ***FMD culling rates - CATTLE***

| System                        | Animal category             | Min % | Max % | New min (%) | New max (%) | Confidence* (1-5) |
|-------------------------------|-----------------------------|-------|-------|-------------|-------------|-------------------|
| Smallholder subsistence       | Male calves (<1 year old)   | 0     | 0     |             |             |                   |
|                               | Female calves (<1 year old) | 0     | 0     |             |             |                   |
|                               | Bulls (>1 year old)         | 0     | 0     |             |             |                   |
|                               | Heifers (>1 year old)       | 0     | 0     |             |             |                   |
|                               | Cows                        | 0     | 5     |             |             |                   |
| Smallholder market-orientated | Male calves (<1 year old)   | 0     | 0     |             |             |                   |
|                               | Female calves (<1 year old) | 0     | 0     |             |             |                   |
|                               | Bulls (>1 year old)         | 0     | 0     |             |             |                   |
|                               | Heifers (>1 year old)       | 0     | 0     |             |             |                   |
|                               | Cows                        | 0     | 10    |             |             |                   |
| Rural commercial              | Male calves (<1 year old)   | 0     | 0     |             |             |                   |
|                               | Female calves (<1 year old) | 0     | 0     |             |             |                   |
|                               | Bulls (>1 year old)         | 0     | 0     |             |             |                   |
|                               | Heifers (>1 year old)       | 0     | 0     |             |             |                   |
|                               | Cows                        | 0     | 15    |             |             |                   |
| Peri-Urban                    | Male calves (<1 year old)   | 0     | 0     |             |             |                   |
|                               | Female calves (<1 year old) | 0     | 0     |             |             |                   |
|                               | Bulls (>1 year old)         | 0     | 0     |             |             |                   |
|                               | Heifers (>1 year old)       | 0     | 0     |             |             |                   |
|                               | Cows                        | 0     | 15    |             |             |                   |
| Corporate                     | Male calves (<1 year old)   | 0     | 0     |             |             |                   |
|                               | Female calves (<1 year old) | 0     | 0     |             |             |                   |
|                               | Bulls (>1 year old)         | 0     | 0     |             |             |                   |
|                               | Heifers (>1 year old)       | 0     | 0     |             |             |                   |
|                               | Cows                        | 0     | 10    |             |             |                   |
| Dairy colonies                | Male calves (<1 year old)   | 0     | 0     |             |             |                   |
|                               | Female calves (<1 year old) | 0     | 0     |             |             |                   |
|                               | Bulls (>1 year old)         | 0     | 0     |             |             |                   |
|                               | Heifers (>1 year old)       | 0     | 0     |             |             |                   |
|                               | Cows                        | 0     | 15    |             |             |                   |

## Case fatality rates

1. What percentage of FMD cases **die due to FMD**? These are deaths in the acute phase and not distress sales. Below is the range used in the current economic model. If you disagree, please insert the new numbers in the columns provided.

### **FMD case fatality – BUFFALO**

| System                        | Animal category             | Min %      | Max % | Most likely (%) | New min (%) | New max (%) | New most likely (%) | Confidence* (1-5) |
|-------------------------------|-----------------------------|------------|-------|-----------------|-------------|-------------|---------------------|-------------------|
| Smallholder subsistence       | Male calves (<1 year old)   | 24         | 44    | 34              |             |             |                     |                   |
|                               | Female calves (<1 year old) | 24         | 44    | 34              |             |             |                     |                   |
|                               | Bulls (>1 year old)         | 5          | 25    | 15              |             |             |                     |                   |
|                               | Heifers (>1 year old)       | 5          | 25    | 15              |             |             |                     |                   |
|                               | Cows                        | 2.2        | 4.2   | 3.2             |             |             |                     |                   |
| Smallholder market-orientated | Male calves (<1 year old)   | 24         | 44    | 34              |             |             |                     |                   |
|                               | Female calves (<1 year old) | 24         | 44    | 34              |             |             |                     |                   |
|                               | Bulls (>1 year old)         | 5          | 25    | 15              |             |             |                     |                   |
|                               | Heifers (>1 year old)       | 5          | 25    | 15              |             |             |                     |                   |
|                               | Cows                        | 2.2        | 4.2   | 3.2             |             |             |                     |                   |
| Rural commercial              | Male calves (<1 year old)   | 24         | 44    | 34              |             |             |                     |                   |
|                               | Female calves (<1 year old) | 24         | 44    | 34              |             |             |                     |                   |
|                               | Bulls (>1 year old)         | 5          | 25    | 15              |             |             |                     |                   |
|                               | Heifers (>1 year old)       | 5          | 25    | 15              |             |             |                     |                   |
|                               | Cows                        | 2.2        | 4.2   | 3.2             |             |             |                     |                   |
| Peri-Urban                    | Male calves (<1 year old)   | 24         | 44    | 34              |             |             |                     |                   |
|                               | Female calves (<1 year old) | 24         | 44    | 34              |             |             |                     |                   |
|                               | Bulls (>1 year old)         | 5          | 25    | 15              |             |             |                     |                   |
|                               | Heifers (>1 year old)       | 5          | 25    | 15              |             |             |                     |                   |
|                               | Cows                        | 2.2        | 4.2   | 3.2             |             |             |                     |                   |
| Corporate                     | Male calves (<1 year old)   | No buffalo |       |                 |             |             |                     |                   |
|                               | Female calves (<1 year old) | No buffalo |       |                 |             |             |                     |                   |
|                               | Bulls (>1 year old)         | No buffalo |       |                 |             |             |                     |                   |
|                               | Heifers (>1 year old)       | No buffalo |       |                 |             |             |                     |                   |
|                               | Cows                        | No buffalo |       |                 |             |             |                     |                   |
| Dairy colonies                | Male calves (<1 year old)   | 24         | 44    | 34              |             |             |                     |                   |
|                               | Female calves (<1 year old) | 24         | 44    | 34              |             |             |                     |                   |
|                               | Bulls (>1 year old)         | 5          | 25    | 15              |             |             |                     |                   |
|                               | Heifers (>1 year old)       | 5          | 25    | 15              |             |             |                     |                   |
|                               | Cows                        | 2.2        | 4.2   | 3.2             |             |             |                     |                   |

***FMD case fatality – CATTLE***

| System                        | Animal category             | Min %     | Max % | Most likely (%) | New min (%) | New max (%) | New most likely (%) | Confidence* (1-5) |
|-------------------------------|-----------------------------|-----------|-------|-----------------|-------------|-------------|---------------------|-------------------|
| Smallholder subsistence       | Male calves (<1 year old)   | No cattle |       |                 |             |             |                     |                   |
|                               | Female calves (<1 year old) | No cattle |       |                 |             |             |                     |                   |
|                               | Bulls (>1 year old)         | No cattle |       |                 |             |             |                     |                   |
|                               | Heifers (>1 year old)       | No cattle |       |                 |             |             |                     |                   |
|                               | Cows                        | No cattle |       |                 |             |             |                     |                   |
| Smallholder market-orientated | Male calves (<1 year old)   | No cattle |       |                 |             |             |                     |                   |
|                               | Female calves (<1 year old) | No cattle |       |                 |             |             |                     |                   |
|                               | Bulls (>1 year old)         | No cattle |       |                 |             |             |                     |                   |
|                               | Heifers (>1 year old)       | No cattle |       |                 |             |             |                     |                   |
|                               | Cows                        | No cattle |       |                 |             |             |                     |                   |
| Rural commercial              | Male calves (<1 year old)   | 21        | 41    | 31              |             |             |                     |                   |
|                               | Female calves (<1 year old) | 21        | 41    | 31              |             |             |                     |                   |
|                               | Bulls (>1 year old)         | 10        | 30    | 20              |             |             |                     |                   |
|                               | Heifers (>1 year old)       | 10        | 30    | 20              |             |             |                     |                   |
|                               | Cows                        | 3.5       | 5.5   | 4.5             |             |             |                     |                   |
| Peri-Urban                    | Male calves (<1 year old)   | 21        | 41    | 31              |             |             |                     |                   |
|                               | Female calves (<1 year old) | 21        | 41    | 31              |             |             |                     |                   |
|                               | Bulls (>1 year old)         | 10        | 30    | 20              |             |             |                     |                   |
|                               | Heifers (>1 year old)       | 10        | 30    | 20              |             |             |                     |                   |
|                               | Cows                        | 3.5       | 5.5   | 4.5             |             |             |                     |                   |
| Corporate                     | Male calves (<1 year old)   | 8         | 16    | 12              |             |             |                     |                   |
|                               | Female calves (<1 year old) | 8         | 16    | 12              |             |             |                     |                   |
|                               | Bulls (>1 year old)         | 2         | 12    | 7               |             |             |                     |                   |
|                               | Heifers (>1 year old)       | 2         | 12    | 7               |             |             |                     |                   |
|                               | Cows                        | 1         | 10    | 5               |             |             |                     |                   |
| Dairy colonies                | Male calves (<1 year old)   | 21        | 41    | 31              |             |             |                     |                   |
|                               | Female calves (<1 year old) | 21        | 41    | 31              |             |             |                     |                   |
|                               | Bulls (>1 year old)         | 10        | 30    | 20              |             |             |                     |                   |
|                               | Heifers (>1 year old)       | 10        | 30    | 20              |             |             |                     |                   |
|                               | Cows                        | 3.5       | 5.5   | 4.5             |             |             |                     |                   |

## Abortion rates

1. What percentage of cows and heifers **abort** due to FMD?

| Species | Animal category | Min % | Max % | Most likely (%) | New min (%) | New max (%) | New most likely (%) | Confidence* (1-5) |
|---------|-----------------|-------|-------|-----------------|-------------|-------------|---------------------|-------------------|
| Buffalo | Heifers         | 0     | 10    | 4               |             |             |                     |                   |
|         | Cows            | 0     | 10    | 4               |             |             |                     |                   |
| Cattle  | Heifers         | 10    | 18    | 25              |             |             |                     |                   |
|         | Cows            | 10    | 25    | 15              |             |             |                     |                   |

## **5. Reaction and expenditure**

## FMD vaccination

1. Estimate the percentage of farms that are vaccinated by province and production system. This is **preventive** vaccination (NOT emergency) using **IMPORTED** vaccines.

| Province                    | Production system             | Minimum | Maximum | Most likely | Confidence*(1-5) |
|-----------------------------|-------------------------------|---------|---------|-------------|------------------|
| Azad Jammu and Kashmir      | Smallholder subsistence       |         |         |             |                  |
|                             | Smallholder market-orientated |         |         |             |                  |
|                             | Rural commercial              |         |         |             |                  |
|                             | Peri-Urban                    |         |         |             |                  |
|                             | Corporate                     |         |         |             |                  |
|                             | Dairy colonies                |         |         |             |                  |
| Balochistan                 | Smallholder subsistence       |         |         |             |                  |
|                             | Smallholder market-orientated |         |         |             |                  |
|                             | Rural commercial              |         |         |             |                  |
|                             | Peri-Urban                    |         |         |             |                  |
|                             | Corporate                     |         |         |             |                  |
|                             | Dairy colonies                |         |         |             |                  |
| Gilgit-Baltistan            | Smallholder subsistence       |         |         |             |                  |
|                             | Smallholder market-orientated |         |         |             |                  |
|                             | Rural commercial              |         |         |             |                  |
|                             | Peri-Urban                    |         |         |             |                  |
|                             | Corporate                     |         |         |             |                  |
|                             | Dairy colonies                |         |         |             |                  |
| Islamabad Capital Territory | Smallholder subsistence       |         |         |             |                  |
|                             | Smallholder market-orientated |         |         |             |                  |
|                             | Rural commercial              |         |         |             |                  |
|                             | Peri-Urban                    |         |         |             |                  |
|                             | Corporate                     |         |         |             |                  |
|                             | Dairy colonies                |         |         |             |                  |
| Khyber Pakhtunkhwa          | Smallholder subsistence       |         |         |             |                  |
|                             | Smallholder market-orientated |         |         |             |                  |
|                             | Rural commercial              |         |         |             |                  |
|                             | Peri-Urban                    |         |         |             |                  |
|                             | Corporate                     |         |         |             |                  |
|                             | Dairy colonies                |         |         |             |                  |
| Punjab                      | Smallholder subsistence       |         |         |             |                  |
|                             | Smallholder market-orientated |         |         |             |                  |
|                             | Rural commercial              |         |         |             |                  |
|                             | Peri-Urban                    |         |         |             |                  |
|                             | Corporate                     |         |         |             |                  |
|                             | Dairy colonies                |         |         |             |                  |
| Sindh                       | Smallholder subsistence       |         |         |             |                  |
|                             | Smallholder market-orientated |         |         |             |                  |
|                             | Rural commercial              |         |         |             |                  |
|                             | Peri-Urban                    |         |         |             |                  |
|                             | Corporate                     |         |         |             |                  |
|                             | Dairy colonies                |         |         |             |                  |

2. Estimate the percentage of farms that are vaccinated by province and production system. This is **preventive** vaccination (NOT emergency) using **LOCALLY PRODUCED** vaccines.

| Province                    | Production system             | Minimum | Maximum | Most likely | Confidence*(1-5) |
|-----------------------------|-------------------------------|---------|---------|-------------|------------------|
| Azad Jammu and Kashmir      | Smallholder subsistence       |         |         |             |                  |
|                             | Smallholder market-orientated |         |         |             |                  |
|                             | Rural commercial              |         |         |             |                  |
|                             | Peri-Urban                    |         |         |             |                  |
|                             | Corporate                     |         |         |             |                  |
|                             | Dairy colonies                |         |         |             |                  |
| Balochistan                 | Smallholder subsistence       |         |         |             |                  |
|                             | Smallholder market-orientated |         |         |             |                  |
|                             | Rural commercial              |         |         |             |                  |
|                             | Peri-Urban                    |         |         |             |                  |
|                             | Corporate                     |         |         |             |                  |
|                             | Dairy colonies                |         |         |             |                  |
| Gilgit-Baltistan            | Smallholder subsistence       |         |         |             |                  |
|                             | Smallholder market-orientated |         |         |             |                  |
|                             | Rural commercial              |         |         |             |                  |
|                             | Peri-Urban                    |         |         |             |                  |
|                             | Corporate                     |         |         |             |                  |
|                             | Dairy colonies                |         |         |             |                  |
| Islamabad Capital Territory | Smallholder subsistence       |         |         |             |                  |
|                             | Smallholder market-orientated |         |         |             |                  |
|                             | Rural commercial              |         |         |             |                  |
|                             | Peri-Urban                    |         |         |             |                  |
|                             | Corporate                     |         |         |             |                  |
|                             | Dairy colonies                |         |         |             |                  |
| Khyber Pakhtunkhwa          | Smallholder subsistence       |         |         |             |                  |
|                             | Smallholder market-orientated |         |         |             |                  |
|                             | Rural commercial              |         |         |             |                  |
|                             | Peri-Urban                    |         |         |             |                  |
|                             | Corporate                     |         |         |             |                  |
|                             | Dairy colonies                |         |         |             |                  |
| Punjab                      | Smallholder subsistence       |         |         |             |                  |
|                             | Smallholder market-orientated |         |         |             |                  |
|                             | Rural commercial              |         |         |             |                  |
|                             | Peri-Urban                    |         |         |             |                  |
|                             | Corporate                     |         |         |             |                  |
|                             | Dairy colonies                |         |         |             |                  |
| Sindh                       | Smallholder subsistence       |         |         |             |                  |
|                             | Smallholder market-orientated |         |         |             |                  |
|                             | Rural commercial              |         |         |             |                  |
|                             | Peri-Urban                    |         |         |             |                  |
|                             | Corporate                     |         |         |             |                  |
|                             | Dairy colonies                |         |         |             |                  |

3. Estimate the percentage of outbreaks that are **attended by veterinary staff** in each province.

| Province                    | Minimum | Maximum | Most likely | Confidence*(1-5) |
|-----------------------------|---------|---------|-------------|------------------|
| Azad Jammu and Kashmir      |         |         |             |                  |
| Balochistan                 |         |         |             |                  |
| Gilgit-Baltistan            |         |         |             |                  |
| Islamabad Capital Territory |         |         |             |                  |
| Khyber Pakhtunkhwa          |         |         |             |                  |
| Punjab                      |         |         |             |                  |
| Sindh                       |         |         |             |                  |

4. What is the cost of sending samples to the laboratory?

| Province                    | Fixed cost |
|-----------------------------|------------|
| Azad Jammu and Kashmir      |            |
| Balochistan                 |            |
| Gilgit-Baltistan            |            |
| Islamabad Capital Territory |            |
| Khyber Pakhtunkhwa          |            |
| Punjab                      |            |
| Sindh                       |            |

5. How many people typically attend an outbreak?

| Province                    | Fixed number |
|-----------------------------|--------------|
| Azad Jammu and Kashmir      |              |
| Balochistan                 |              |
| Gilgit-Baltistan            |              |
| Islamabad Capital Territory |              |
| Khyber Pakhtunkhwa          |              |
| Punjab                      |              |
| Sindh                       |              |

For those working in the laboratory:

6. For each epithelium sample submitted, which tests are typically done?
7. Please state the estimated cost of the following laboratory tests

Possible aspects to include (production impacts):

- a) Fertility (include clear definitions)
  - a. Number of cycles missed with cases of FMD
  - b. Case extension to age at first calving
- b) Present morbidity data (used Ferrari's data) and ask if agree, and if different in other systems
- c) Treatment costs

Possible aspects to include (reaction)

- a) Vaccination
  - a. Delivery prices
  - b. Vaccine prices
- b) Sanitary measures
  - a. What is done? What costs are involved?
- c) Trainings conducted
  - a. Number on FMD each year
  - b. Number of attendees
  - c. Estimated costs per province (Maybe just ask this)
  - d. National level trainings
- d) Communications

Specific lab questions

- a) Tests routinely done on samples submitted
- b) Cost of each test (also for NSP)
- c) LIMS maintenance
- d) Staff trainings (number each year)

### **Weighting the responses**

1. Years of experience
2. Confidence in the results

Options:

1. Have individuals reply and weight answers according to a combination of their years of experience and the confidence in the results
2. Have group responses, and weight just by the confidence in the results. Groups can be 2-3 people (so if four large groups in total, these can be split in two)
3. As 2, but each member of the group states their years of experience which are combined for the group weighting with the confidence in the results

Give each section per group. But for regional differences will need people from the provinces.
