# Supplementary material for: Economic Considerations for Advancement Through the Progressive Control Pathway: Cost–Benefit Analysis of an FMD Disease-Free Zone in Punjab Province, Pakistan
Source: Front Vet Sci. 2021 Aug 18;8:703473. doi: 10.3389/fvets.2021.703473 (PMC8416473; doi:10.3389/fvets.2021.703473)
Supplement: Supplementary Material A — Production system data. [file Data_Sheet_1.zip › Supplementary material E - Data request for beef feedlots - updated.pdf]

# Supplementary material E – Data request for beef feedlots

| Beef feedlot variable                                                | Minimum | Most likely | Maximum |
|----------------------------------------------------------------------|---------|-------------|---------|
| <b><i>FMD outbreaks</i></b>                                          |         |             |         |
| Morbidity rate (% of animals that get FMD during a typical outbreak) |         |             |         |
| Case fatality rate (% of FMD cases that die)                         |         |             |         |
| Extra days required for finishing in FMD cases (days)                |         |             |         |
| Treatment costs for case of FMD (PKR)                                |         |             |         |
| Total time spent treating sick animals (minutes)                     |         |             |         |
| Cost of additional vet services during outbreak (PKR)                |         |             |         |
| <b><i>Feed costs</i></b>                                             |         |             |         |
| Normal feed intakes per day (kg per animal)                          |         |             |         |
| Feed intakes per day while animal has FMD (kg per animal)            |         |             |         |
| Cost per kg of feed                                                  |         |             |         |
| <b><i>Value of animals</i></b>                                       |         |             |         |
| Value of finished animal (not affected by FMD) (PKR)                 |         |             |         |
| Value of finished animal (if affected previously by FMD) (PKR)       |         |             |         |
| <b><i>Other</i></b>                                                  |         |             |         |
| Labour costs (PKR per day)                                           |         |             |         |
