# Supplementary material for: Economic Considerations for Advancement Through the Progressive Control Pathway: Cost–Benefit Analysis of an FMD Disease-Free Zone in Punjab Province, Pakistan
Source: Front Vet Sci. 2021 Aug 18;8:703473. doi: 10.3389/fvets.2021.703473 (PMC8416473; doi:10.3389/fvets.2021.703473)
Supplement: Supplementary Material A — Production system data. [file Data_Sheet_1.zip › Supplementary material H - Results - costs and benefits by year.pdf]

## Supplementary material H

Costs and benefits of a proposed FMD disease free zone in Punjab province, Pakistan, over a 20-year period. Median, non-discounted values are presented. Benefits are based on averted production losses and treatment costs due to FMD alone. All values in million PKR.

| Year of programme | Costs (billion PKR) | Benefits (billion PKR) |
|-------------------|---------------------|------------------------|
| 0                 | 1.98                | 3.88                   |
| 1                 | 4.08                | 3.87                   |
| 2                 | 4.46                | 3.88                   |
| 3                 | 3.81                | 3.96                   |
| 4                 | 4.22                | 4.07                   |
| 5                 | 4.15                | 4.18                   |
| 6                 | 4.13                | 4.26                   |
| 7                 | 4.15                | 4.30                   |
| 8                 | 4.14                | 4.31                   |
| 9                 | 4.15                | 4.31                   |
| 10                | 4.15                | 4.31                   |
| 11                | 4.15                | 4.31                   |
| 12                | 4.14                | 4.31                   |
| 13                | 4.15                | 4.31                   |
| 14                | 4.14                | 4.31                   |
| 15                | 4.15                | 4.31                   |
| 16                | 4.15                | 4.31                   |
| 17                | 4.15                | 4.31                   |
| 18                | 4.13                | 4.31                   |
| 19                | 4.15                | 4.31                   |
